# Supplementary material
Source: PubMed Central journal article supplement (PMC4545249)
Supplement: NIHMS715847-supplement-Supporting_Information.pdf [file NIHMS715847-supplement-Supporting_Information.pdf]

*Supporting Information for*

## **Salinipyronone and pacificanone are biosynthetic byproducts of the rosamicin polyketide synthase**

Takayoshi Awakawa<sup>[a, b]</sup>, Max Crüsemann<sup>[a]</sup>, Jason Munguia<sup>[c]</sup>, Nadine Ziemert<sup>[a]</sup>, Victor Nizet<sup>[c, d]</sup>, William Fenical<sup>[a]</sup>, and Bradley S. Moore\*<sup>[a, d]</sup>

[a] Center of Marine Biotechnology and Biomedicine, Scripps Institution of Oceanography, University of California at San Diego, 9500 Gilman Drive, La Jolla, CA 92093-0204 (USA)

[b] □ Graduate School of Pharmaceutical Sciences, The University of Tokyo, 7-3-1 Hongo, Bunkyo-ku, Tokyo 113-0033 (Japan)

[c] Pediatrics, University of California at San Diego, 9500 Gilman Drive, La Jolla, CA 92093 (USA)

[d] Skaggs School of Pharmacy and Pharmaceutical Sciences, University of California at San Diego, 9500 Gilman Drive, La Jolla, CA 92093 (USA)

□

### **Table of Contents**

|                                     |                |
|-------------------------------------|----------------|
| <b>Supplementary Figures S1-S35</b> | <b>S2-S21</b>  |
| <b>Supplementary Tables S1-S10</b>  | <b>S22-S32</b> |

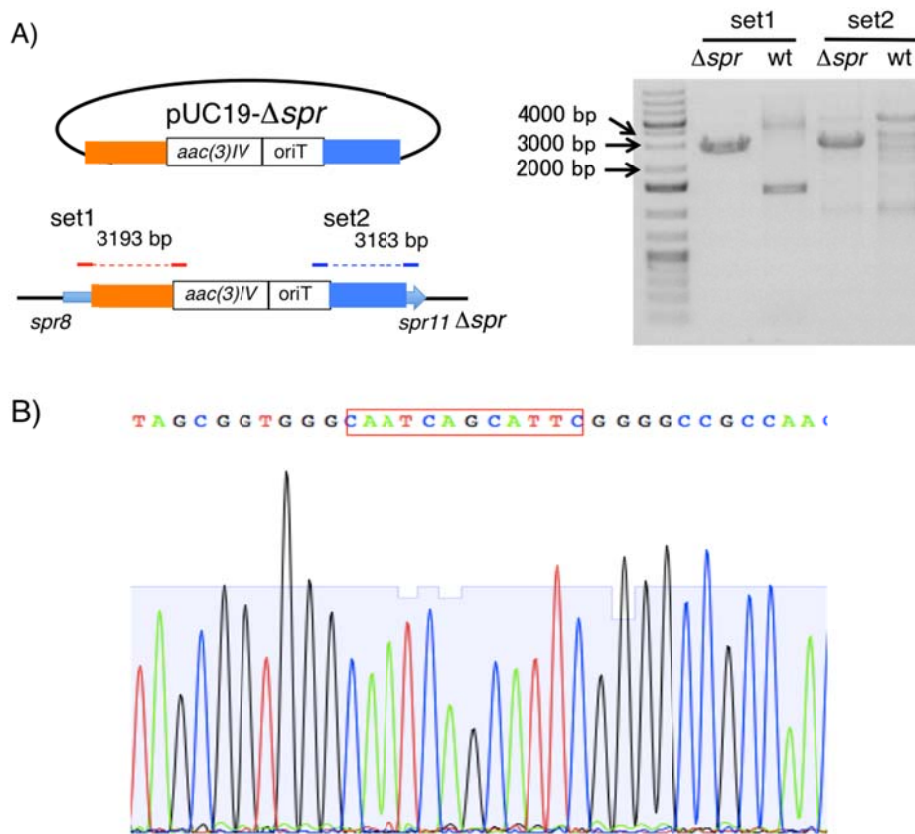

**Figure S1** The evaluation of  $\Delta$ *spr* and *spr10Y1290F* strains

(A) PCR amplification by using gDNA from *S. pacifica* CNS-237 and  $\Delta$ *spr* strain. (B) Sequence result of the 595-bp fragment amplified from *spr10Y1290F* strain. The red frame shows the mutated sequence in this study.

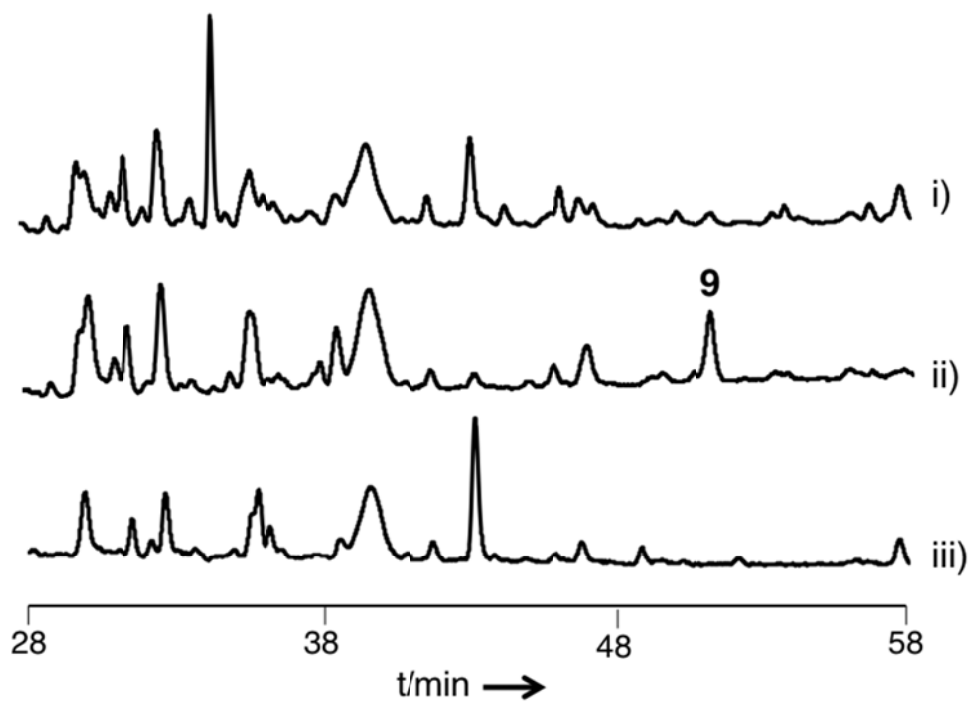

**Figure S2** HPLC analyses of the metabolites from i) CNS-237, ii) *spr10Y1290F*, and iii)  $\Delta spr$  cultured in A1FeBC medium. The traces represent chromatograms acquired by detection at 280 nm.

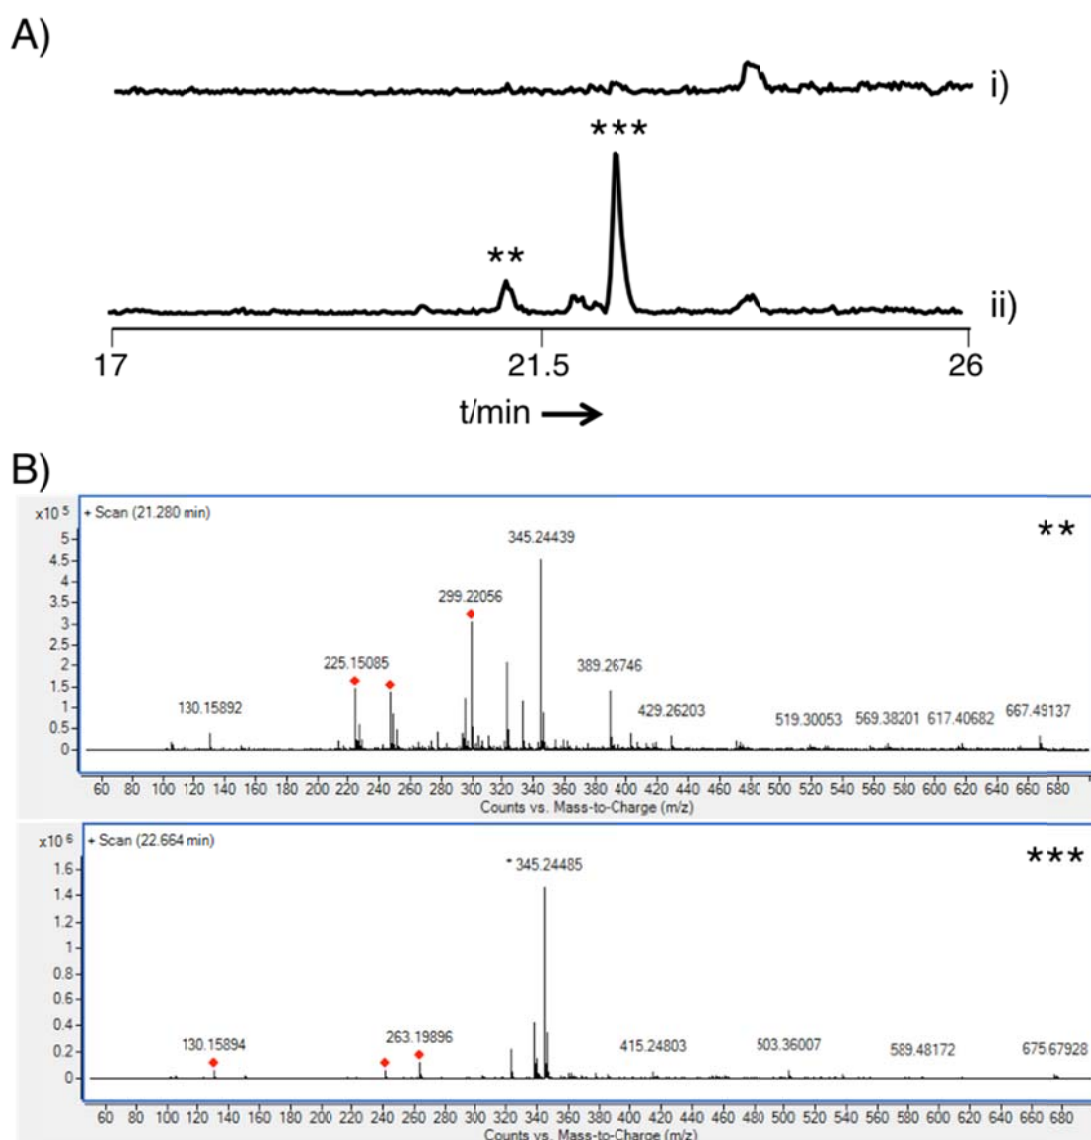

**Figure S3** (A) Extracted chromatograms (345.240 m/z) of the metabolites from i) CNS-237 and ii) *spr10Y1290F* cultured in A1+BFe medium (\*\* and \*\*\* indicate the compounds whose MSes are identical to **2**). (B) MS spectra of \*\* and \*\*\*.

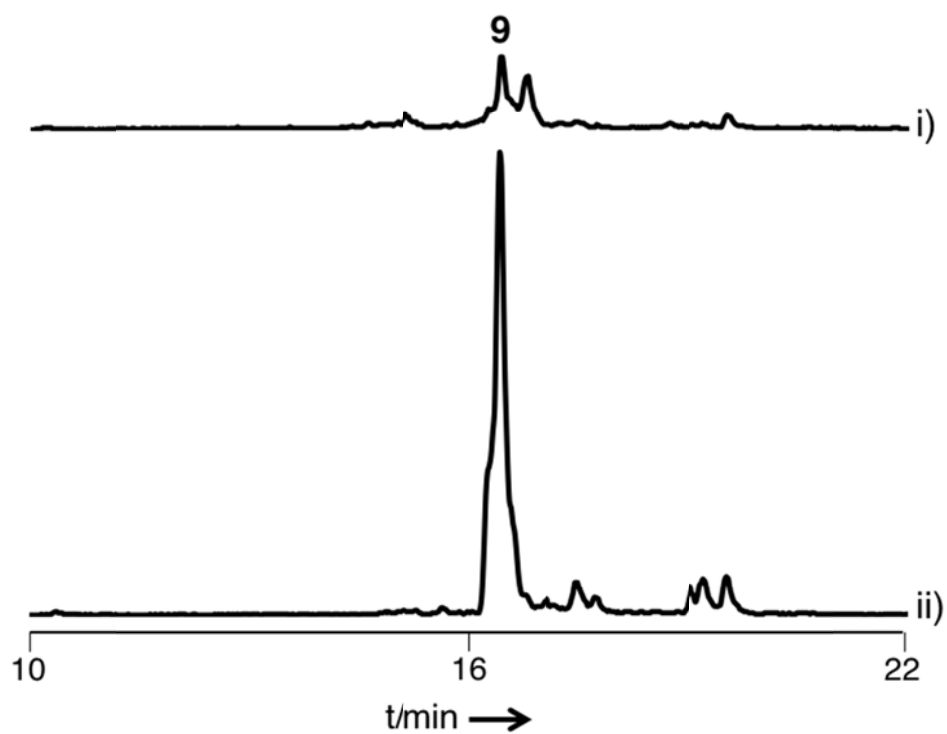

**Figure S4** LC-MS analyses of the metabolites from i) CNS-237 and ii) *spr10Y1290F* cultured in A1+BFe medium. The traces represent extracted chromatograms (431.242 m/z).

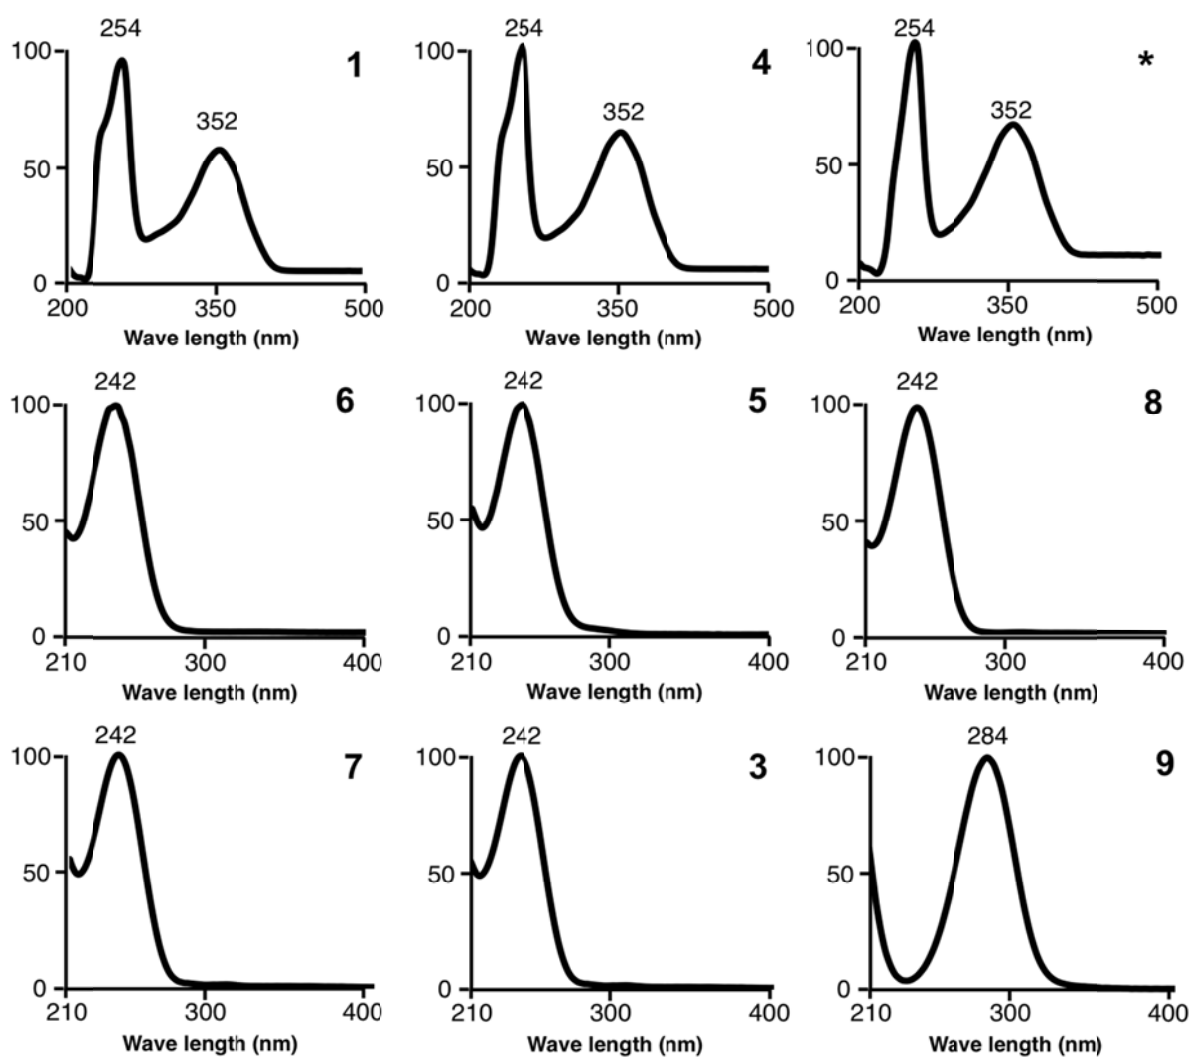

**Figure S5** UV spectra of compound **1**, **3-9**, and **\***.

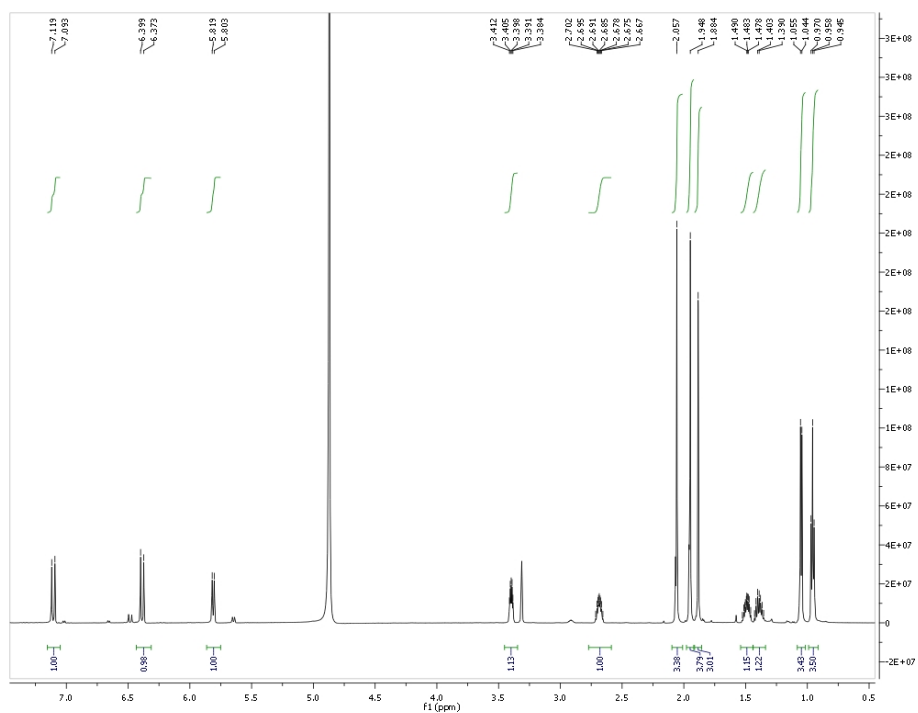

Figure S6  $^1\text{H}$  NMR spectrum of **1** in  $\text{CD}_3\text{OD}$

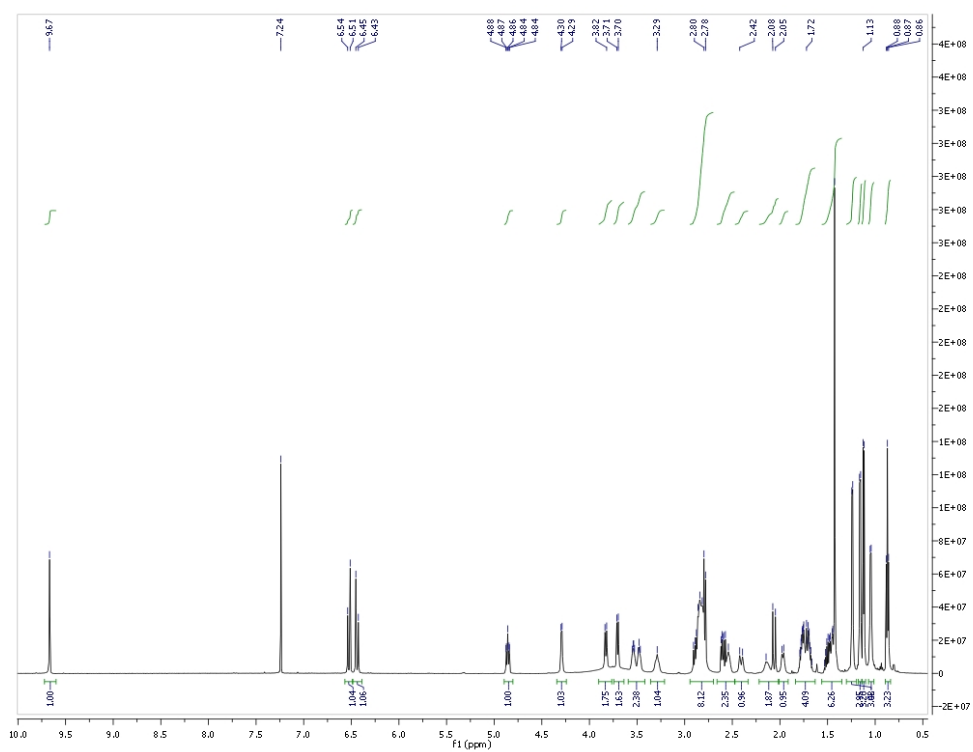

Figure S7  $^1\text{H}$  NMR spectrum of **3** in  $\text{CDCl}_3$

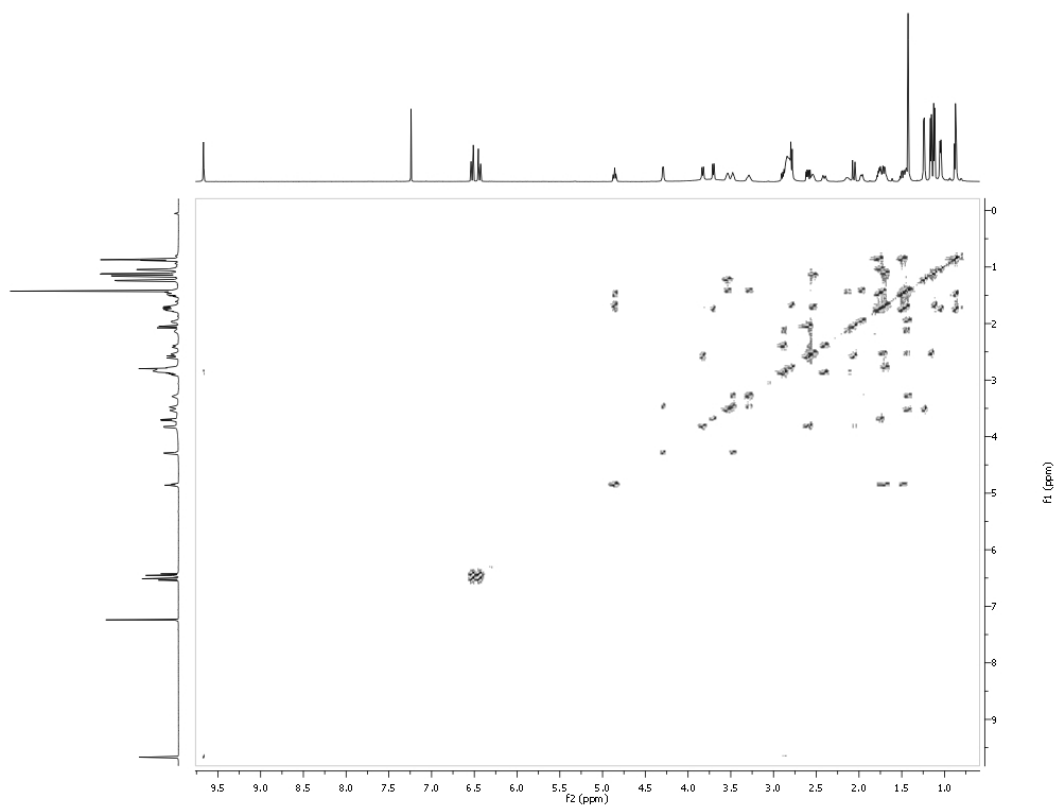

**Figure S8**  $^1\text{H}$ - $^1\text{H}$  COSY spectrum of **3** in  $\text{CDCl}_3$

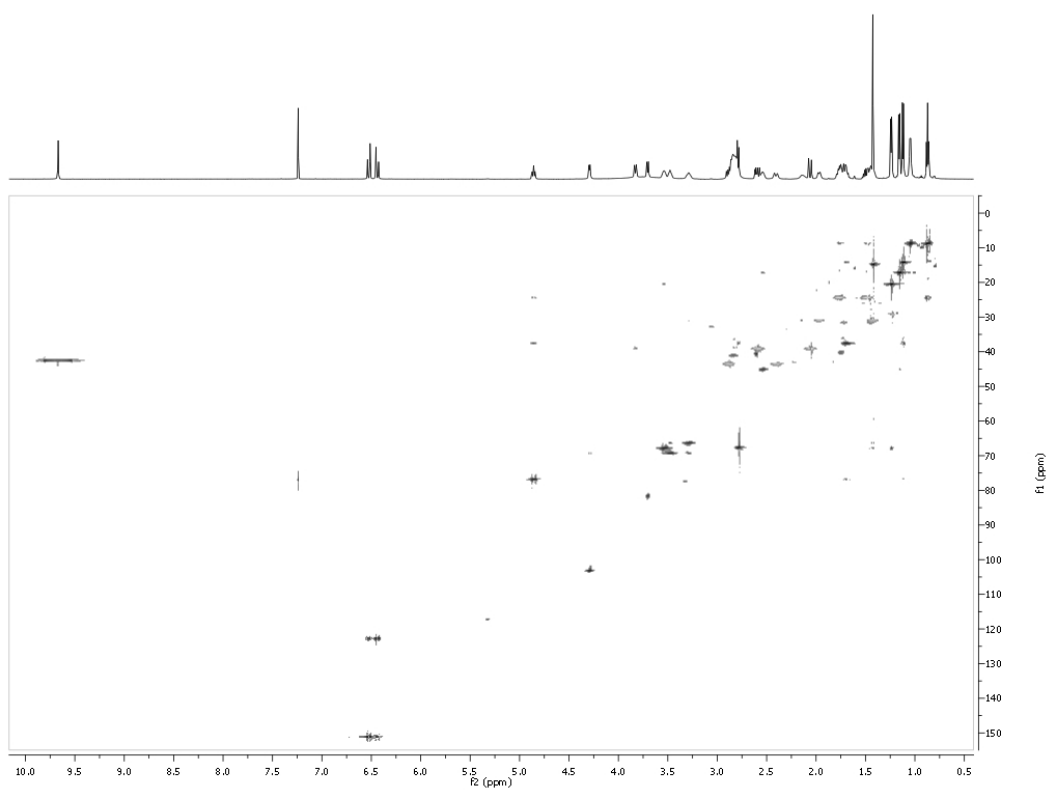

**Figure S9** HSQC spectrum of **3** in  $\text{CDCl}_3$



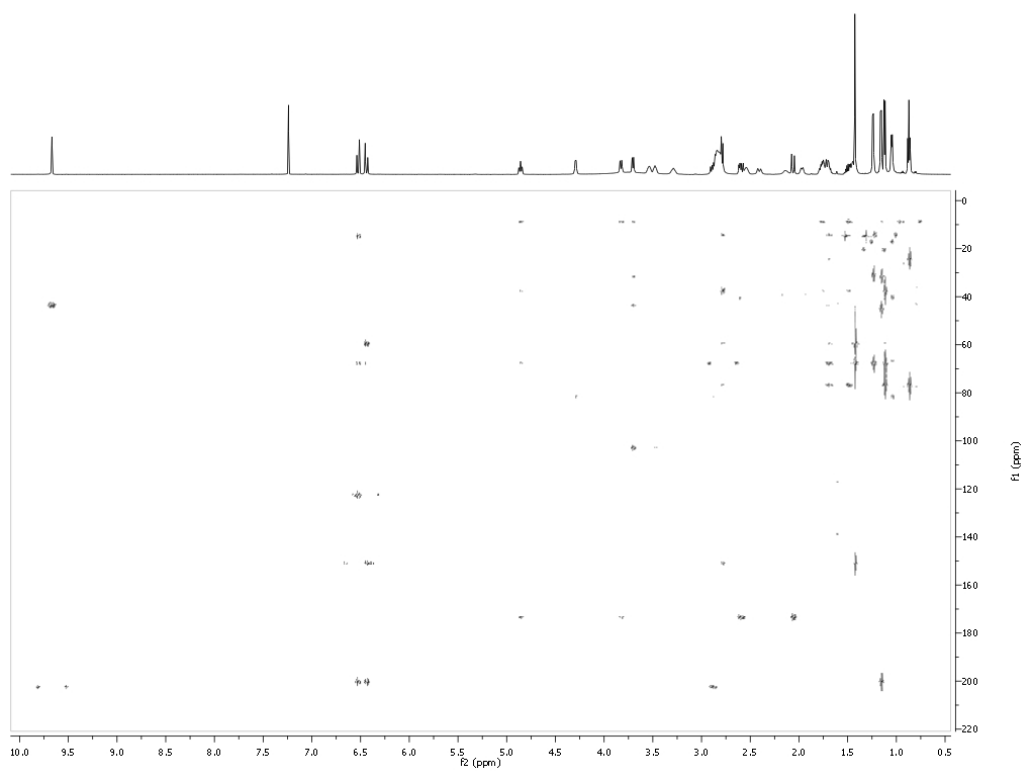

**Figure S10** HMBC spectrum of **3** in  $\text{CDCl}_3$

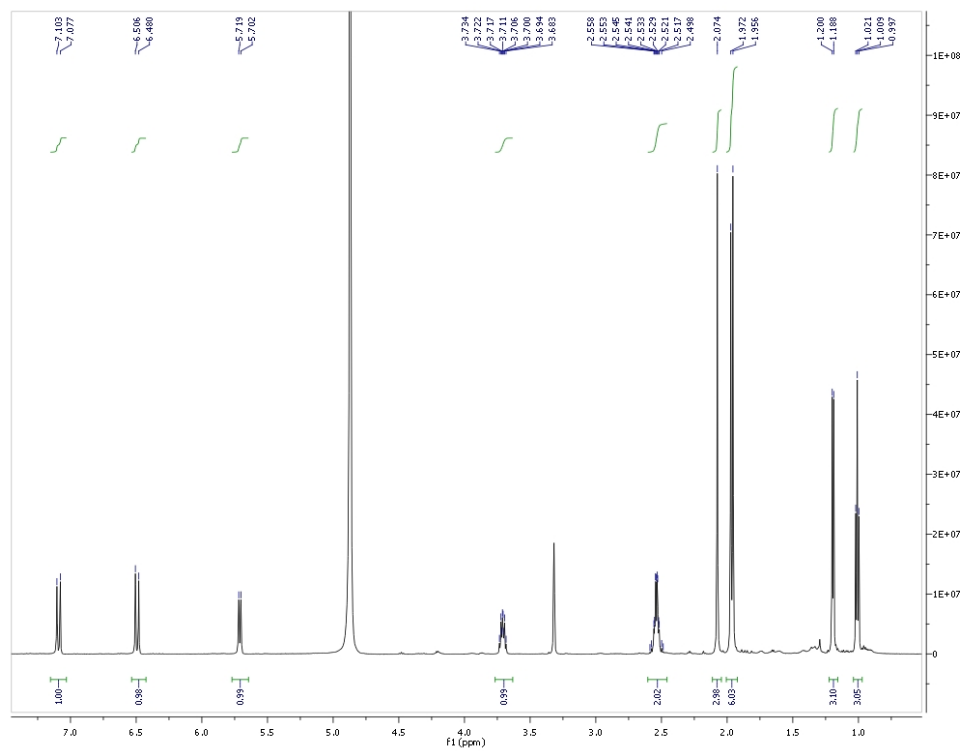

**Figure S11**  $^1\text{H}$  NMR spectrum of **4** in  $\text{CD}_3\text{OD}$

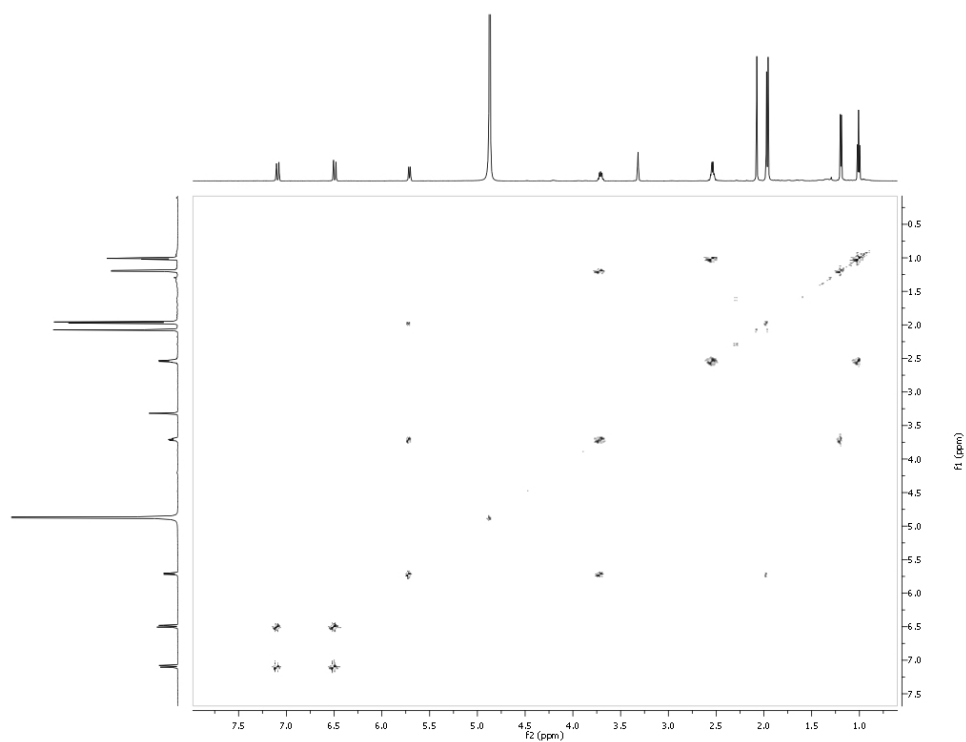

**Figure S12**  $^1\text{H}$ - $^1\text{H}$  COSY spectrum of **4** in  $\text{CD}_3\text{OD}$

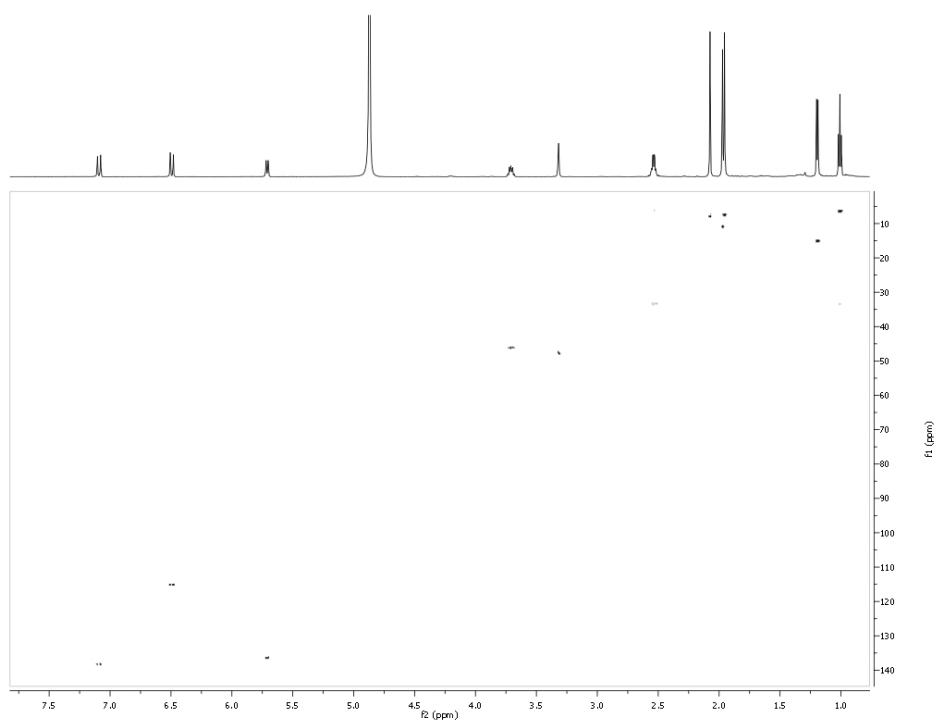

**Figure S13** HSQC spectrum of **4** in  $\text{CD}_3\text{OD}$

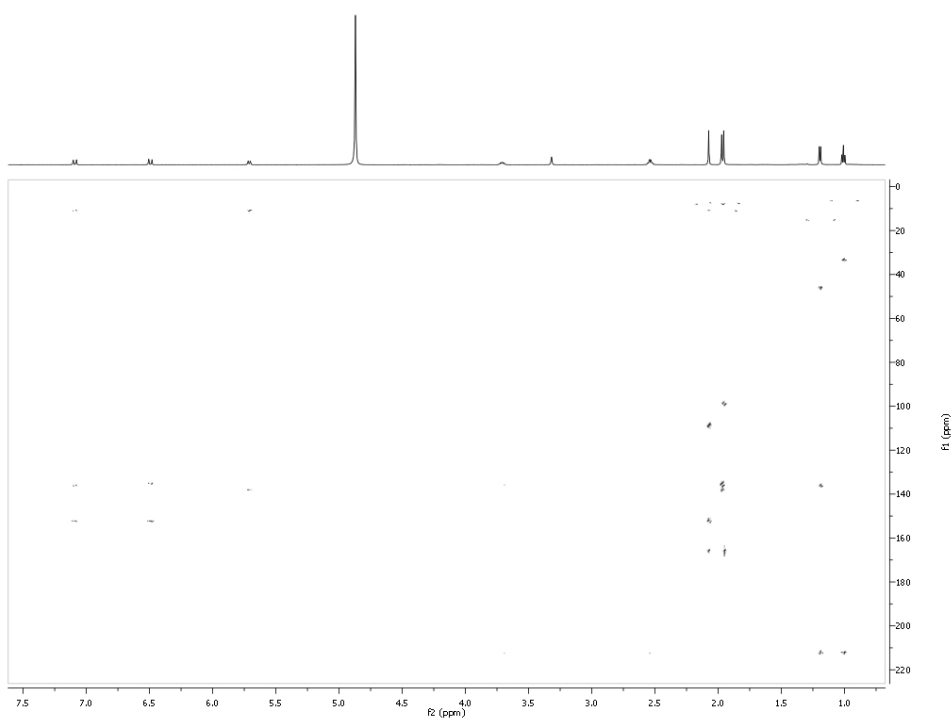

**Figure S14** HMBC spectrum of **4** in CD<sub>3</sub>OD

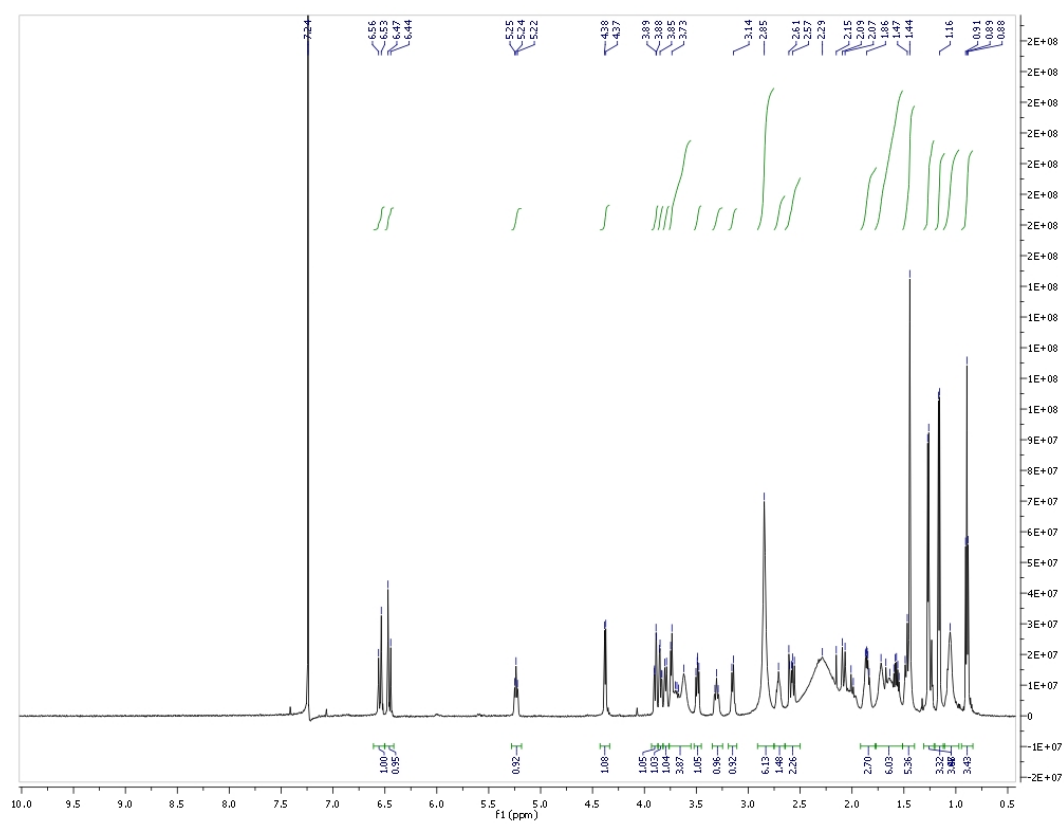

**Figure S15** <sup>1</sup>H NMR spectrum of **5** in CDCl<sub>3</sub>

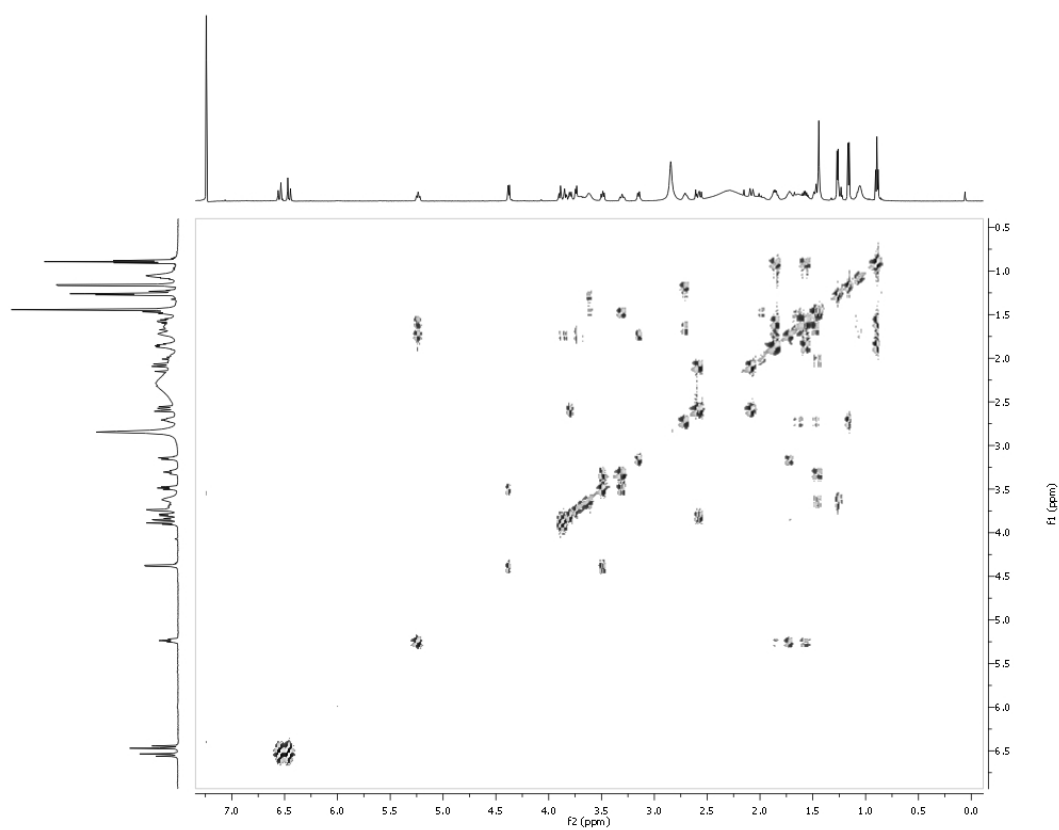

**Figure S16**  $^1\text{H}$ - $^1\text{H}$  COSY spectrum of **5** in  $\text{CDCl}_3$

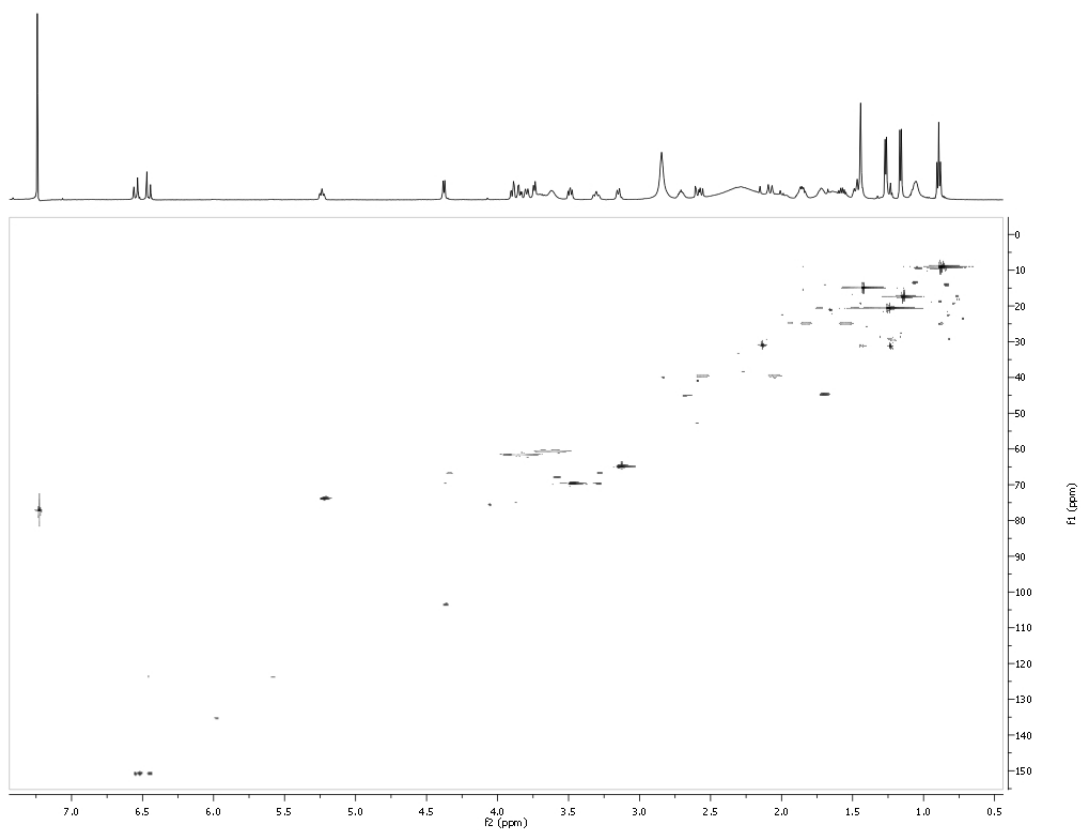

**Figure S17** HSQC spectrum of **5** in  $\text{CDCl}_3$

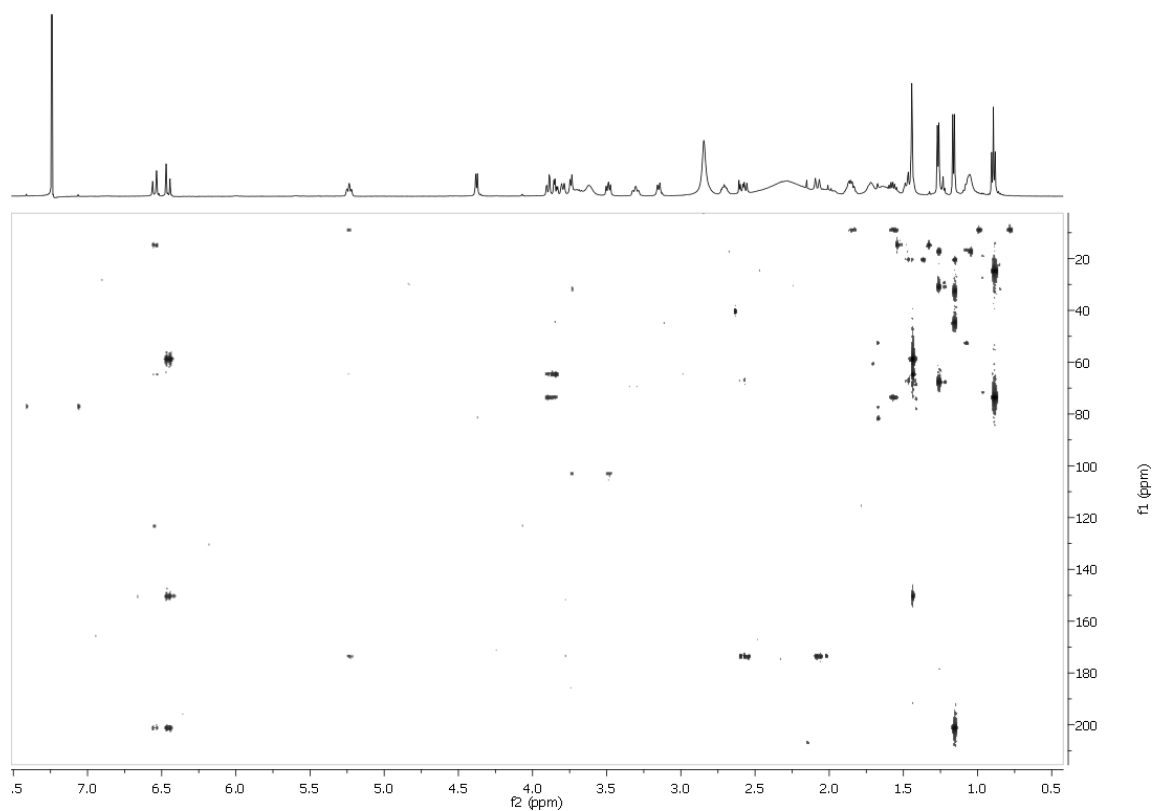

**Figure S18** HMBC spectrum of **5** in  $\text{CDCl}_3$

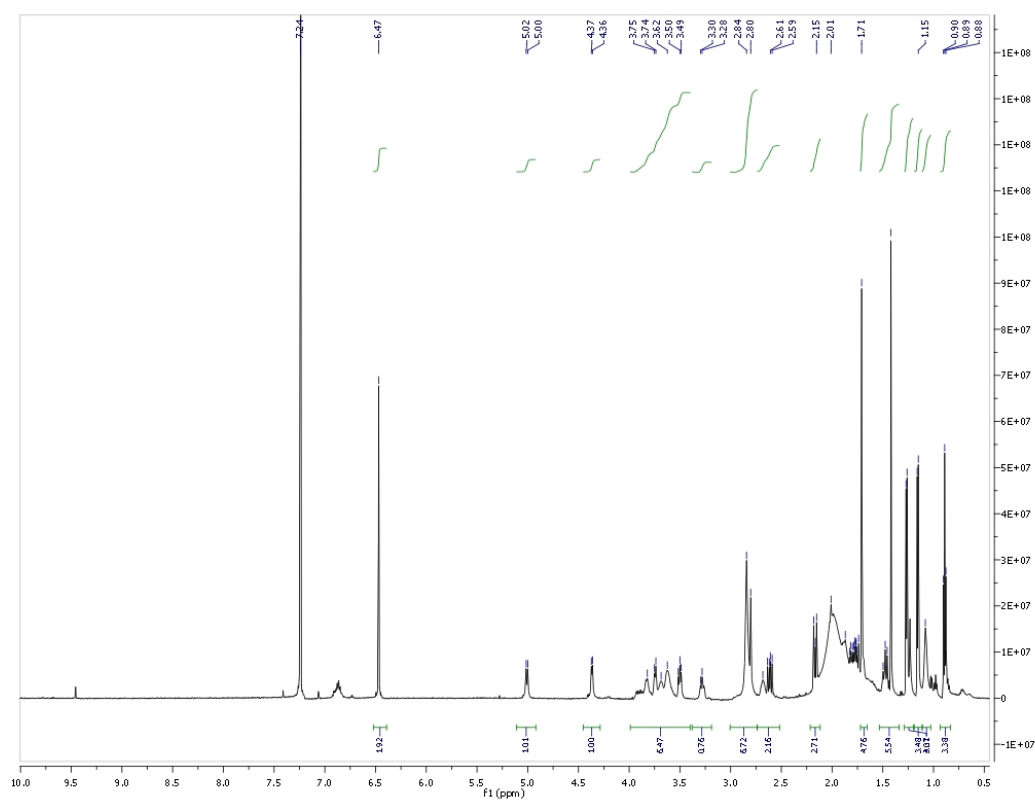

**Figure S19**  $^1\text{H}$  NMR spectrum of **6** in  $\text{CDCl}_3$

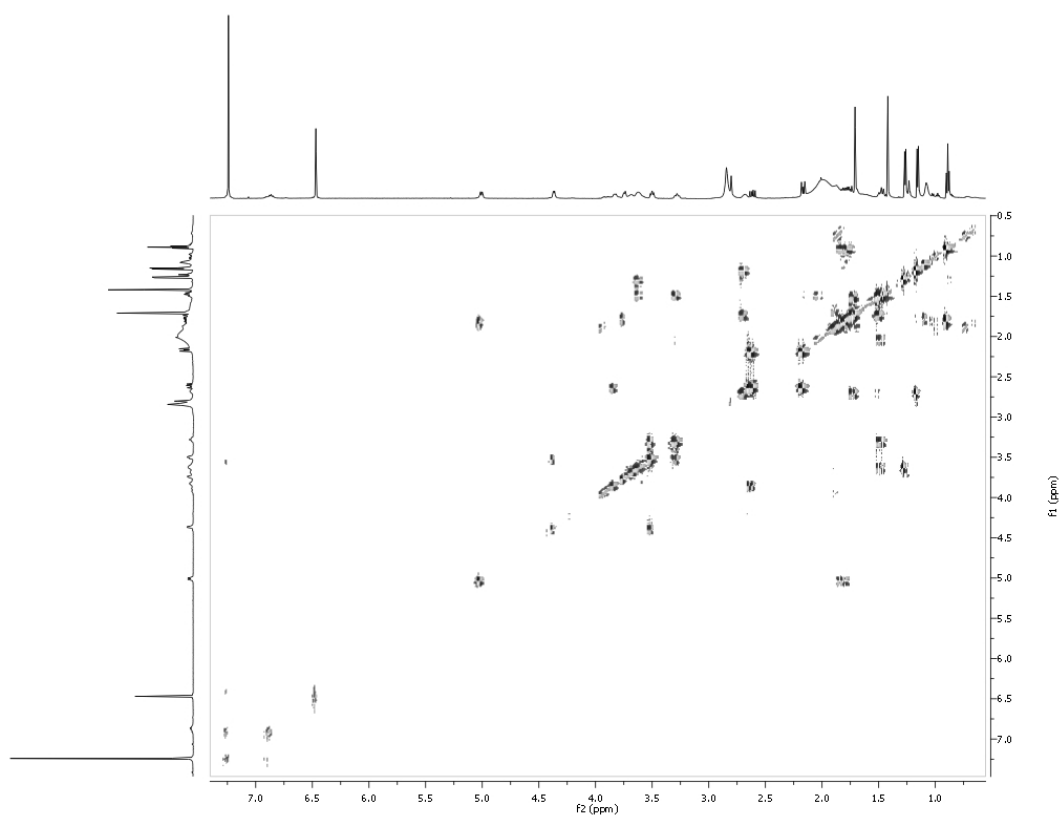

**Figure S20**  $^1\text{H}$ - $^1\text{H}$  COSY spectrum of **6** in  $\text{CDCl}_3$

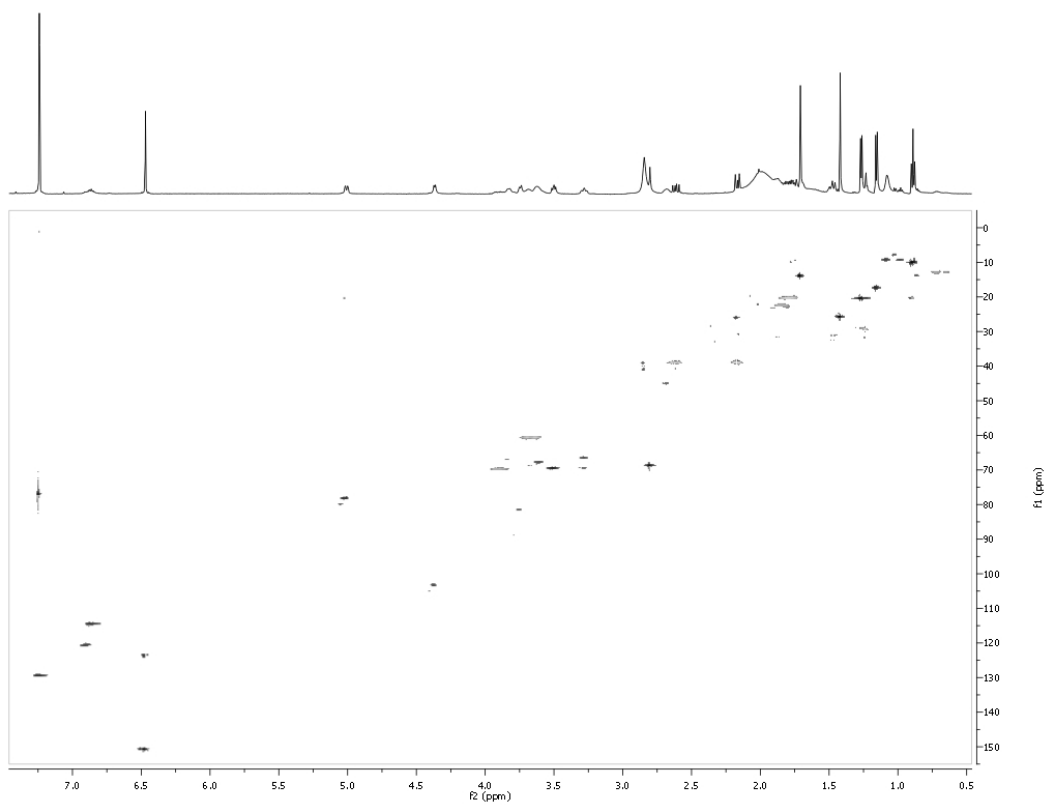

**Figure S21** HSQC spectrum of **6** in  $\text{CDCl}_3$

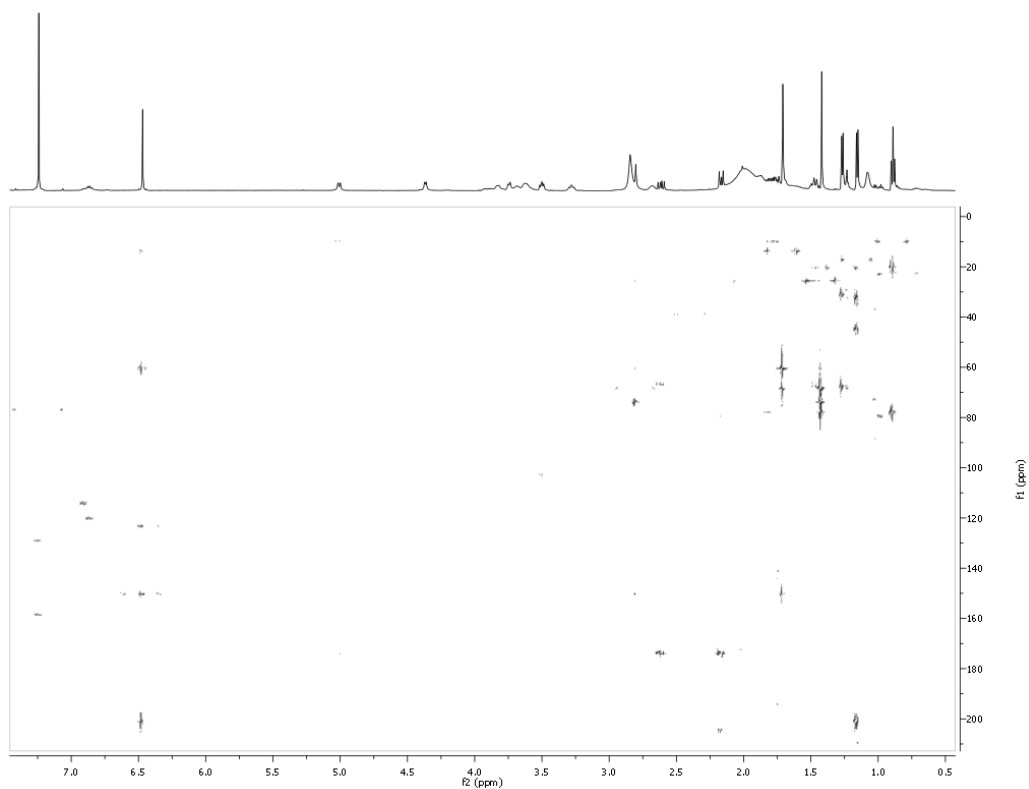

**Figure S22** HMBC spectrum of **6** in  $\text{CDCl}_3$

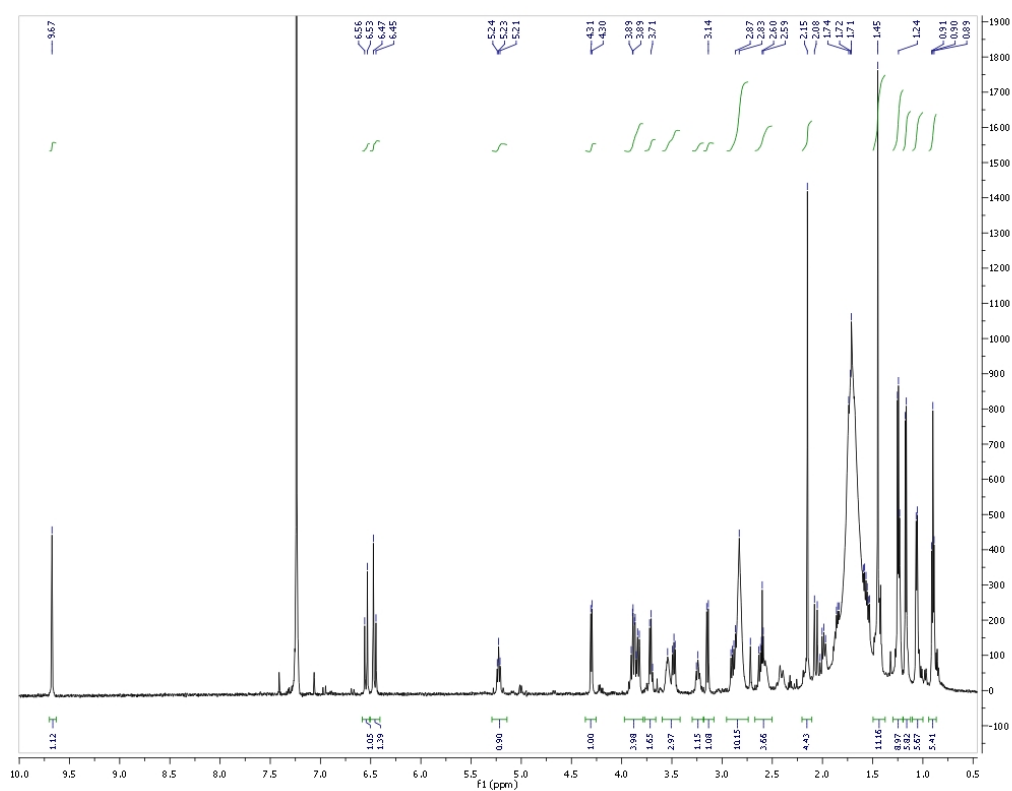

**Figure S23**  $^1\text{H}$  NMR spectrum of **7** in  $\text{CDCl}_3$

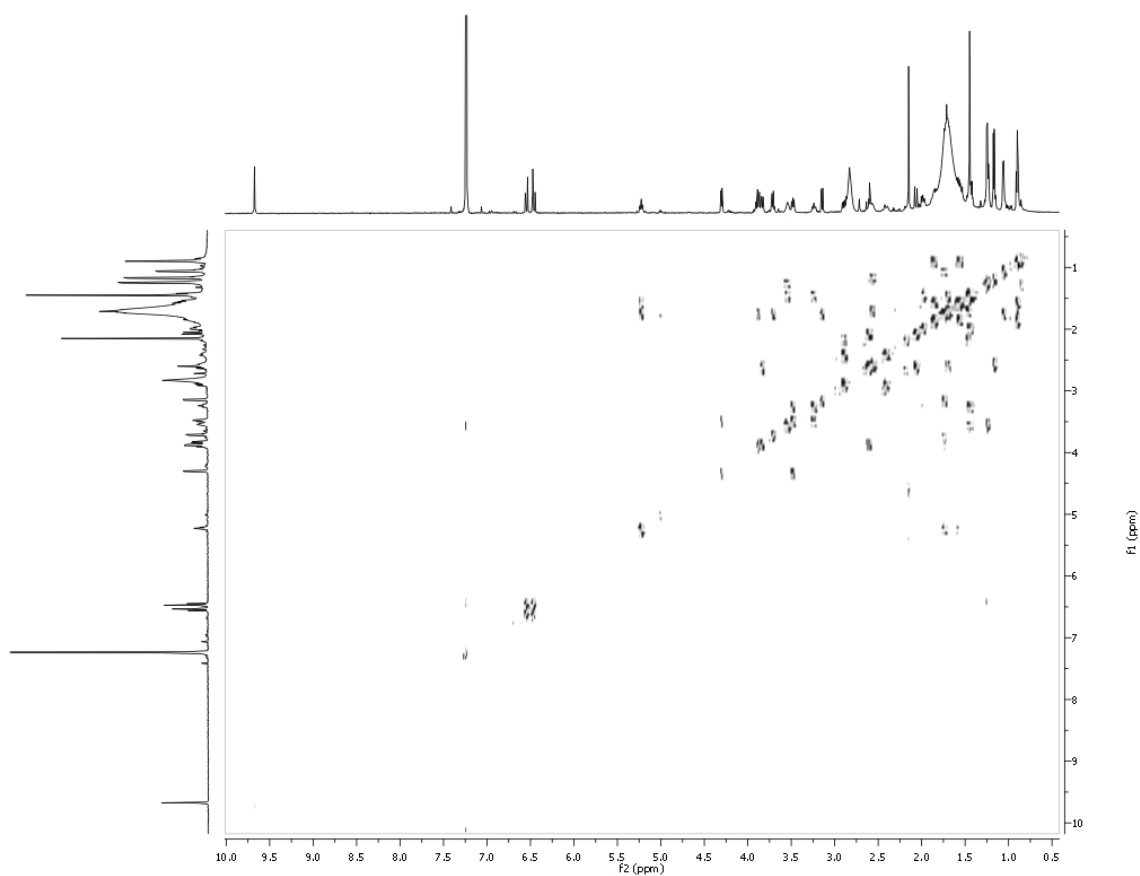

**Figure S24**  $^1\text{H}$ - $^1\text{H}$  COSY spectrum of **7** in  $\text{CDCl}_3$

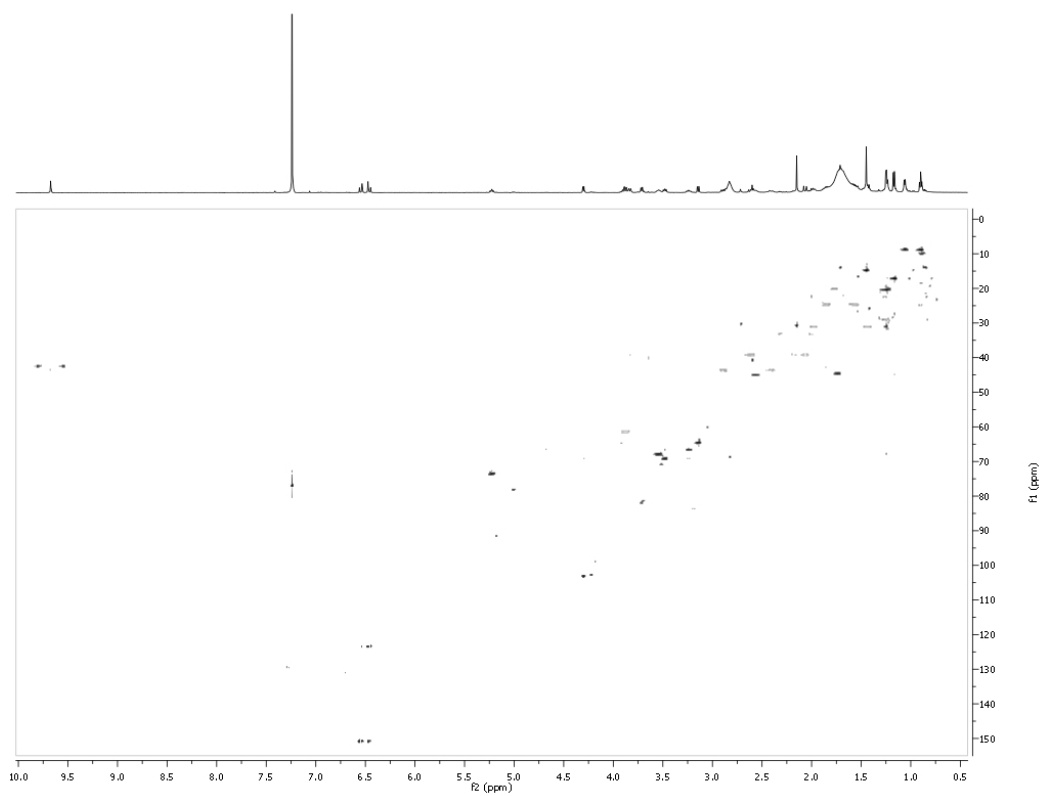

**Figure S25** HSQC spectrum of **7** in  $\text{CDCl}_3$



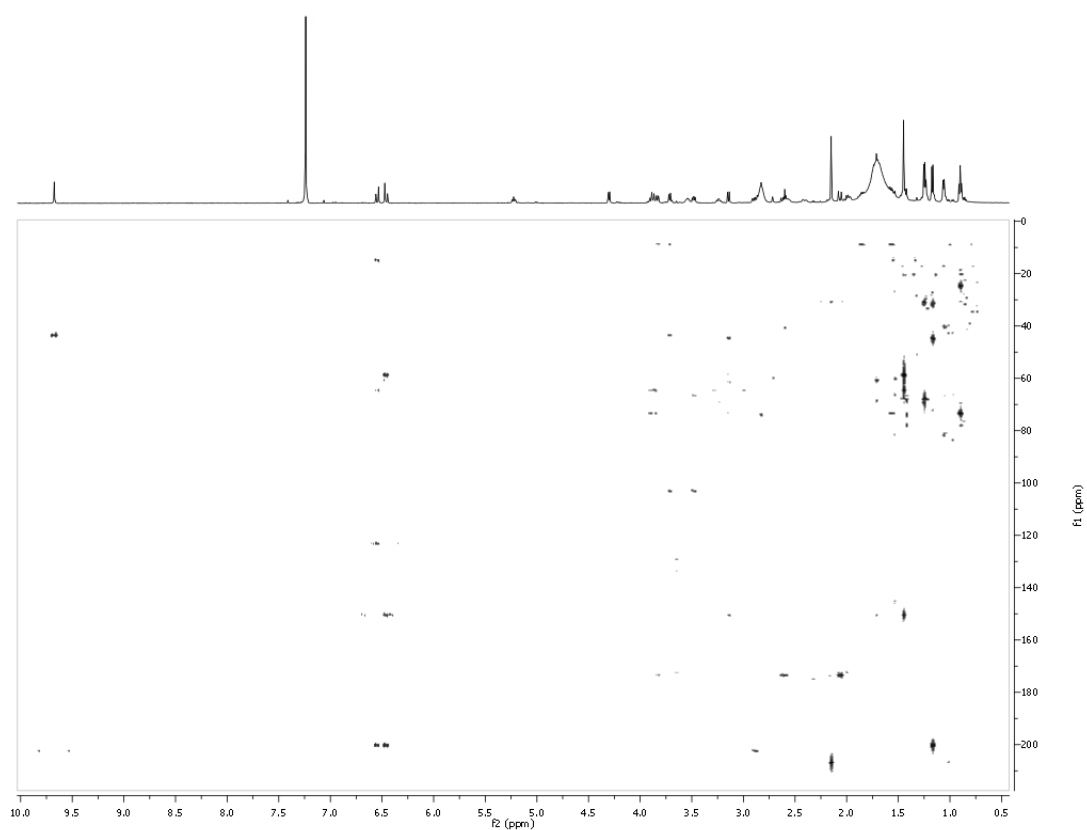

**Figure S26** HMBC spectrum of **7** in  $\text{CDCl}_3$

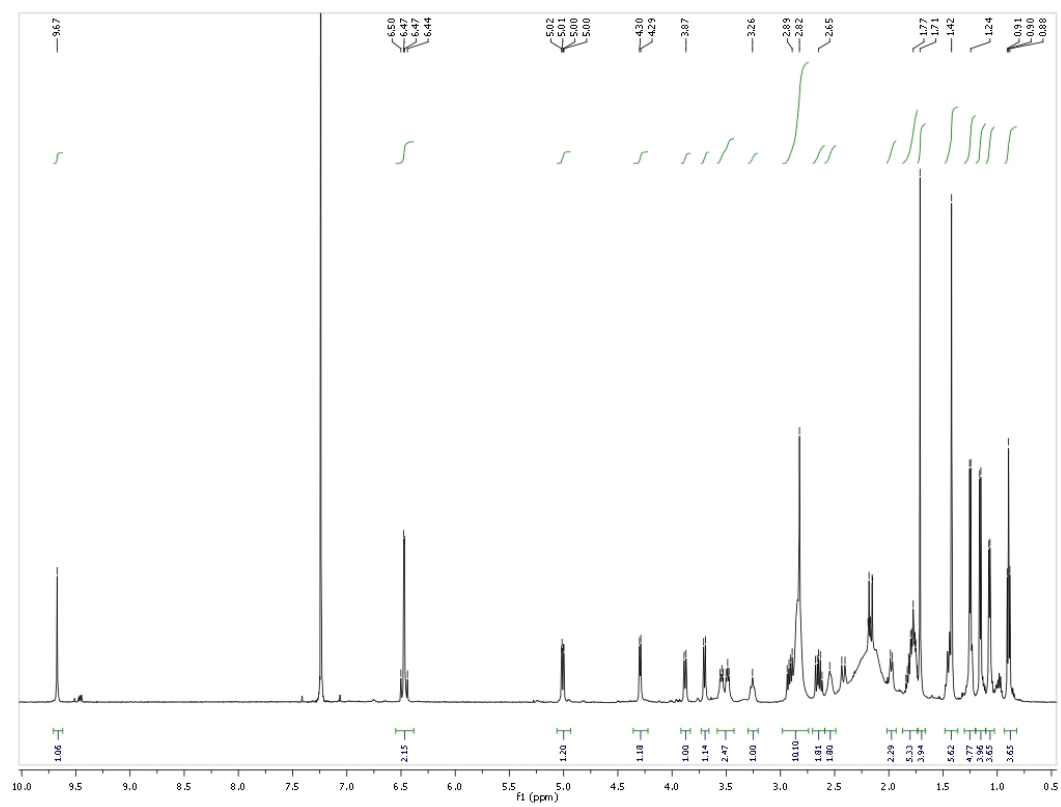

**Figure S27**  $^1\text{H}$  NMR spectrum of **8** in  $\text{CDCl}_3$

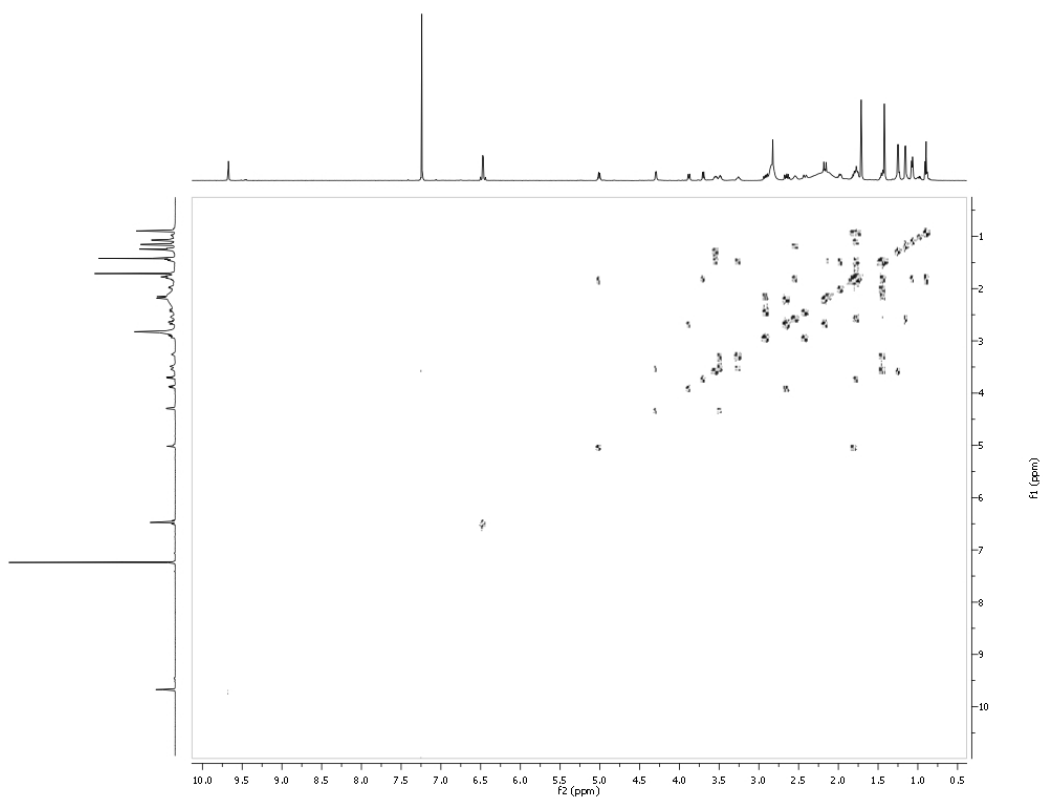

**Figure S28**  $^1\text{H}$ - $^1\text{H}$  COSY spectrum of **8** in  $\text{CDCl}_3$

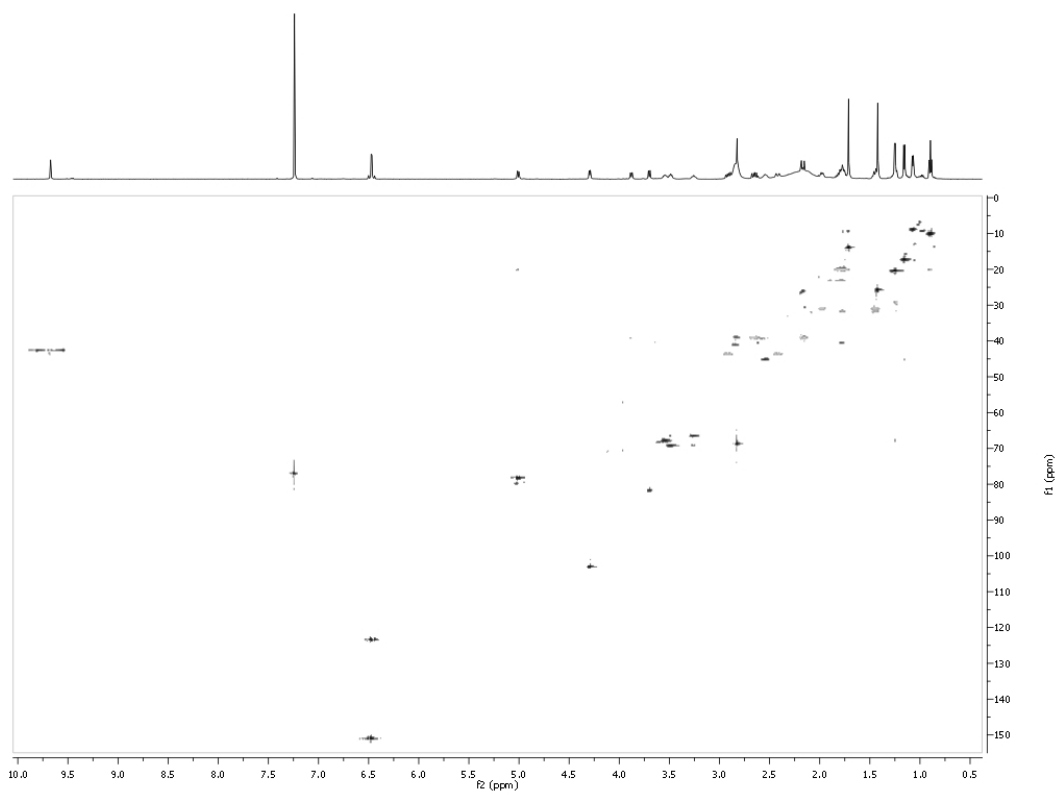

**Figure S29** HSQC spectrum of **8** in  $\text{CDCl}_3$

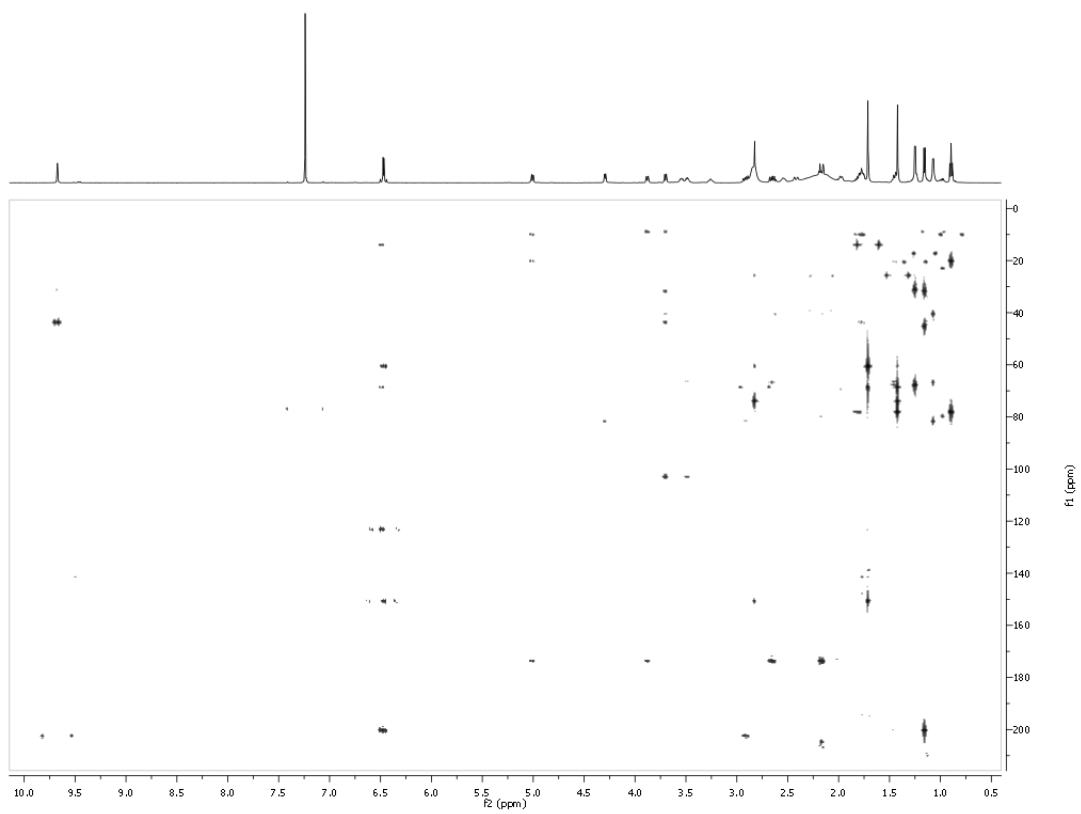

**Figure S30** HMBC spectrum of **8** in CDCl<sub>3</sub>

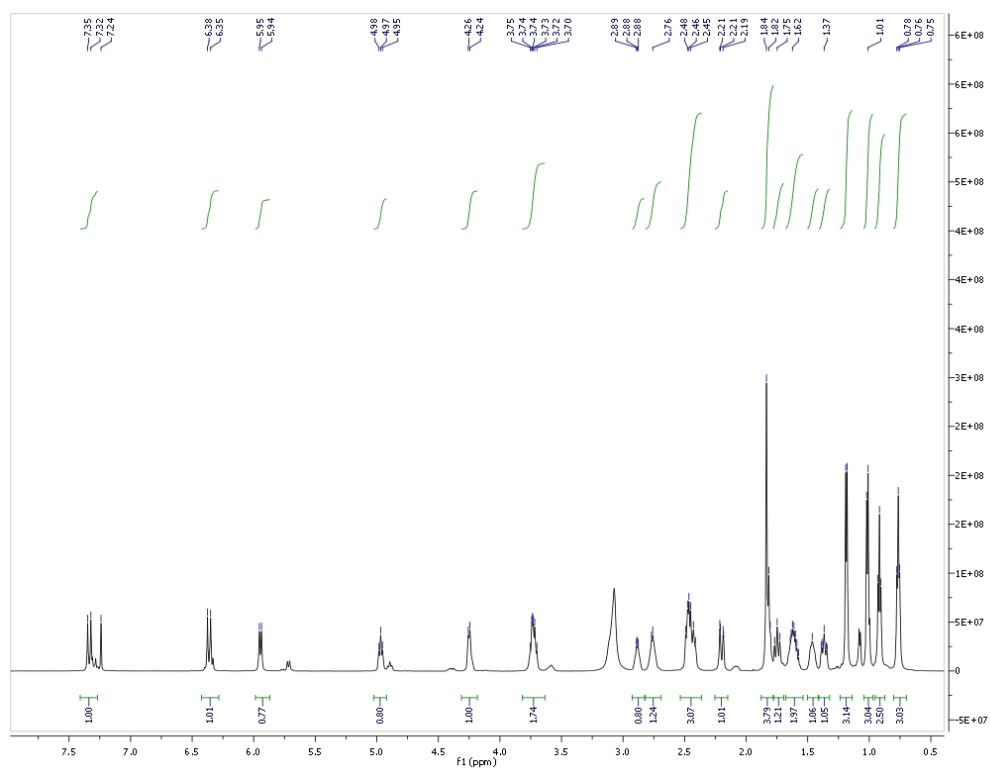

**Figure S31** <sup>1</sup>H NMR spectrum of **9** in CDCl<sub>3</sub>

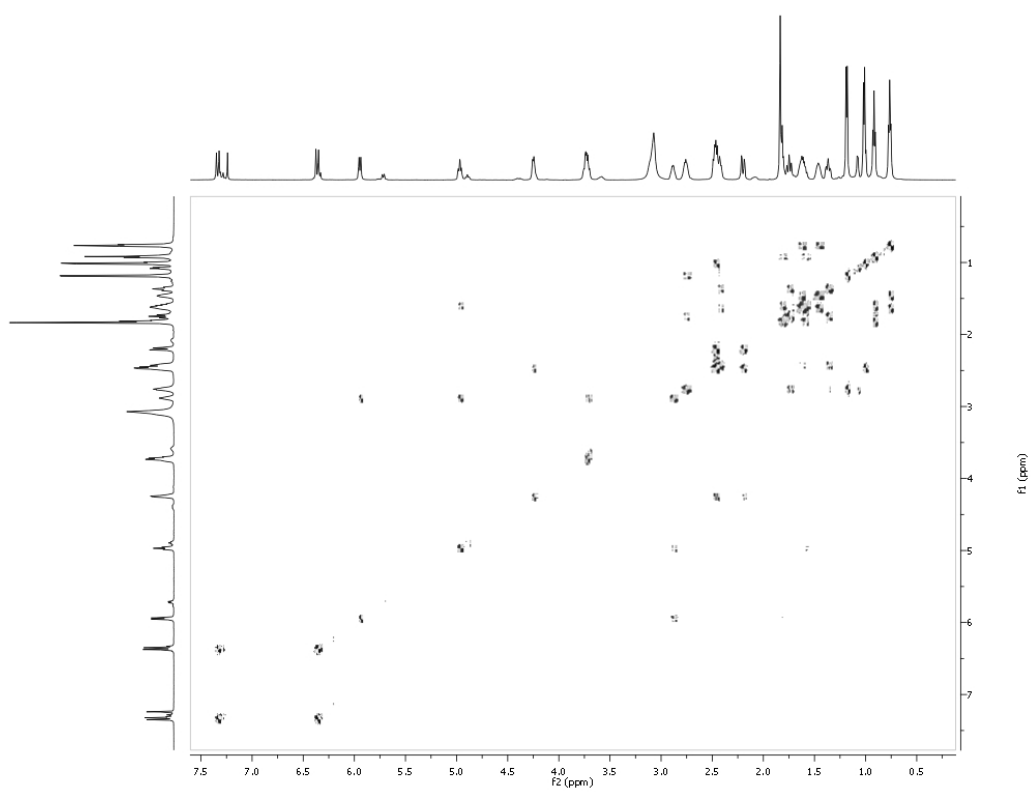

**Figure S32**  $^1\text{H}$ - $^1\text{H}$  COSY spectrum of **9** in  $\text{CDCl}_3$

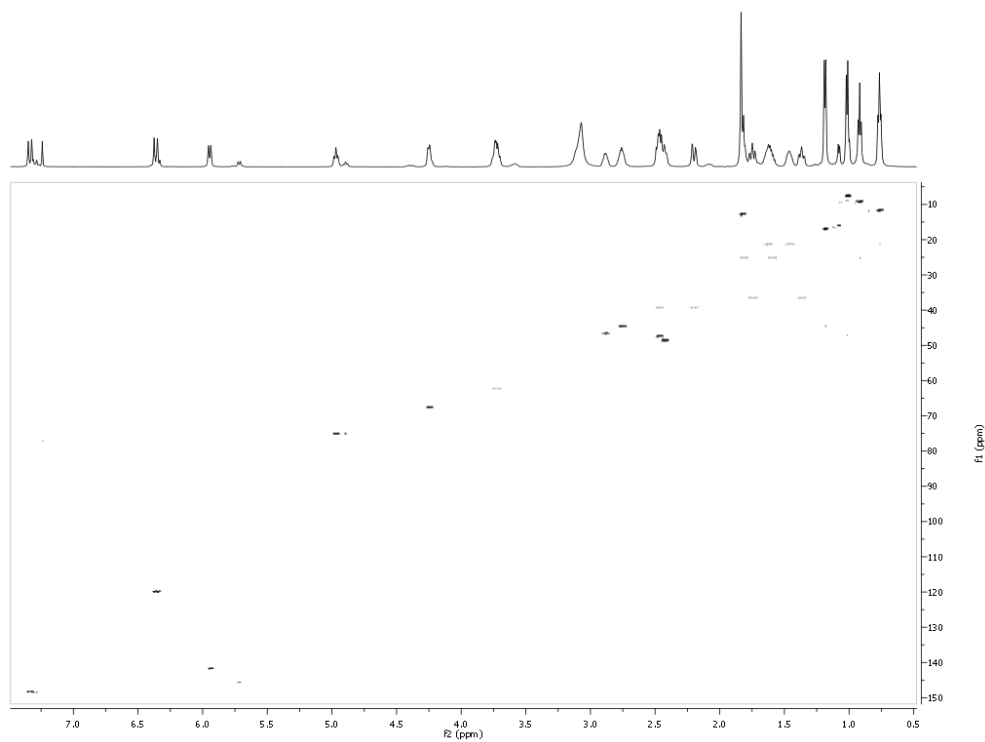

**Figure S33** HSQC spectrum of **9** in  $\text{CDCl}_3$

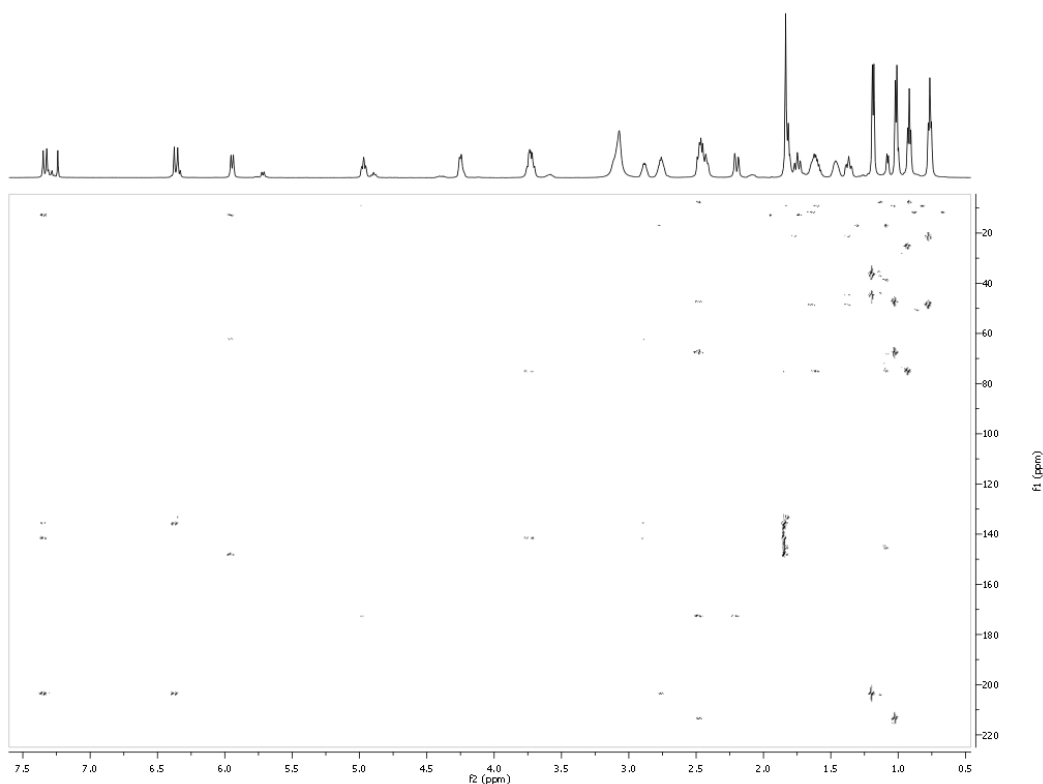

Figure S34 HMBC spectrum of **9** in  $\text{CDCl}_3$

```

SprKR6      1  GTVLVTGGTGALGTHIARRLAA-DGAAHLVLTSSRGADTPGAADLVEELRALGAE-VTVA
TylKR1      1  GTVLI TGGMGAIGRRLARRLAA-EGAERLVLTSRRGPEAPGAAELAEELRGHGCE-VVHA
AveKR1      1  GTVLI TGGTGALATHLTHHLTTHQPTOHLILTSRTGPHTPHAQHLTTQLQOKGIH-LTIT
AveKR7      1  GSVLVTGGTGVLGAAVARHLGAVCGVRDLLLSRRGPDAPGAEGLRAELAALGAE-VRIV
RapKR10     1  GTVLI TGGSGVLAGIAARHLVAERGVRHLLLSRSAPDEA----LISELAE LGA AVVDTA

SprKR6      59  ACDVADRAAVADLLDGLPVTDPLTAVFHTAGVAHSVPVTETGLPDVAEVFAGKVAGARNL
TylKR1      59  ACDVAERDALAALVTAY----PENA VFHTAGILDDAVIDTILSPESFETVRGAKVCGAELL
AveKR1      60  TCDTSNPDQLQOLLNTIPPQHPLTTVIHTAGILDDATLTNLTPTQLNNVLRAKAHSALL
AveKR7      60  ACDVGERREVVRLLLEGVPAGCPLTGVVHAAGVLDDATIASLTPERLGTVFAAKVDAALLL
RapKR10     57  VCDVSDRAGLARVLAGVSPDHPLTAVIHTAGVLDDGVVESLTARRLDTVLVRPKADGAWNLL

SprKR6      119  DELTRG-YDLDAFVLYSSNAGVWGS GGQSAYGAANAALDALAERRRAEGLTATSIAWGLW
TylKR1      115  HOLTADIKGLDAFVLFSSVVTGTWGNAGQGAYAAANAALDALAERRRAAGLPATSVAWGLW
AveKR1      120  HOLTQH-TPLTAFVLYSSAAATFGAFGOANYAAANAYLDALAHHRHHTHLPATSIAWGTW
AveKR7      120  DELTRG-MELSAFVLFSSAAGILGSAGQGN YAAANAALDALAVRRRAAGLPGVSLAWGLW
RapKR10     117  HELTRD-IDLA AFVMYSSAAGVLSAGQGN YAVANAFVDALAEORRAEGLPALALAWGLW

```

Figure S35 Alignment of SprKR6 (KR in the module 7) with known ketoreductase domains.

The red frame shows the catalytic tyrosine residue.

**Table S1** Gene organization of *spr* cluster

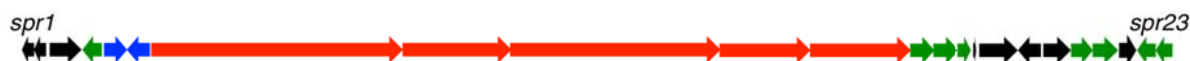

| Gene         | Size<br>(a.a.) | Predicted function                                   | Closest homologue<br>(% Protein identity) | Accession Number |
|--------------|----------------|------------------------------------------------------|-------------------------------------------|------------------|
| <b>Spr1</b>  | 210            | $\alpha/\beta$ hydrolase                             | -                                         | H303DRAFT_03279  |
| <b>Spr2</b>  | 211            | Thioesterase                                         |                                           | H303DRAFT_03280  |
| <b>Spr3</b>  | 550            | ABC transporter                                      |                                           | H303DRAFT_03281  |
| <b>Spr4</b>  | 372            | Aminotransferase<br>DesV                             |                                           | H303DRAFT_03282  |
| <b>Spr5</b>  | 405            | P-450 RosC                                           |                                           | H303DRAFT_03283  |
| <b>Spr6</b>  | 403            | P-450 RosD                                           |                                           | H303DRAFT_03284  |
| <b>Spr7</b>  | 4428           | PKS<br>(KSq-AT-ACP-KS-AT-KR-<br>ACP-KS-AT-DH-KR-ACP) | <i>Micromonospora carbonacea</i> (74)     | AX697987         |
| <b>Spr8</b>  | 1889           | PKS<br>(KS-AT-DH-KR-ACP)                             | <i>Micromonospora carbonacea</i> (74)     | AX697989         |
| <b>Spr9</b>  | 3719           | PKS<br>(KS-AT-KR-ACP-KS-AT-<br>DH-ER-KR-ACP)         | <i>Micromonospora carbonacea</i> (77)     | AX697991         |
| <b>Spr10</b> | 1574           | PKS (KS-AT-KR-ACP)                                   | <i>Micromonospora carbonacea</i> (80)     | AX697993         |
| <b>Spr11</b> | 1796           | PKS (KS-AT-KR-ACP-TE)                                | <i>Micromonospora carbonacea</i> (77)     | AX697995         |
| <b>Spr12</b> | 423            | P-450 DesVIII                                        |                                           | H303DRAFT_04085  |
| <b>Spr13</b> | 440            | Glycosyltransferase<br>DesVII                        |                                           | H303DRAFT_04084  |
| <b>Spr14</b> | 238            | Methyltransferase<br>DesVI                           |                                           | H303DRAFT_04083  |
| <b>Spr15</b> | 67             | Hypothetical protein                                 |                                           | H303DRAFT_04082  |
| <b>Spr16</b> | 671            | Transcriptional<br>regulator                         |                                           | H303DRAFT_04081  |
| <b>Spr17</b> | 404            | Transposase                                          |                                           | H303DRAFT_04080  |
| <b>Spr18</b> | 482            | GTP binding                                          |                                           | H303DRAFT_04079  |
| <b>Spr19</b> | 381            | Aminotransferase DesII                               |                                           | H303DRAFT_04078  |

|              |     |                                  |                 |
|--------------|-----|----------------------------------|-----------------|
| <b>Spr20</b> | 480 | Fe-S oxidoreductase<br>DesI      | H303DRAFT_04077 |
| <b>Spr21</b> | 277 | Dimethyladenosine<br>transferase | H303DRAFT_04076 |
| <b>Spr22</b> | 329 | Dehydratase Des IV               | H303DRAFT_04075 |
| <b>Spr23</b> | 294 | Pyrophosphorylase<br>DesIII      | H303DRAFT_04074 |

**Table S2** <sup>1</sup>H-NMR data for **1** in CD<sub>3</sub>OD ( $\delta$  in ppm,  $J$  in Hz)<sup>a</sup>

| No. | $\delta_H$                           |
|-----|--------------------------------------|
| 6   | 6.37 (d, 1H, $J = 15.6$ )            |
| 7   | 7.09 (d, 1H, $J = 15.6$ )            |
| 9   | 5.81 (d, 1H, $J = 9.6$ )             |
| 10  | 2.69 (m, 1H)                         |
| 11  | 3.40 (ddd, 1H, $J = 4.2, 4.2, 8.4$ ) |
| 12  | 1.39 (m, 1H), 1.49 (m, 1H)           |
| 13  | 0.96 (t, 3H, $J = 7.2$ )             |
| 14  | 1.95 (s, 3H)                         |
| 15  | 2.06 (s, 3H)                         |
| 16  | 1.88 (s, 3H)                         |
| 17  | 1.05 (d, 3H, $J = 8.4$ )             |

<sup>a</sup> **1** was identified as salinipyronone A by comparing its <sup>1</sup>H chemical shift values and optical rotation values with the data reported in Oh, D.; Gontang, E. A.; Kauffman, C. A.; Jensen, P. R.; Fenical, W. *J. Nat. Prod.* **2008**, *71*, 570.



**Table S3**  $^1\text{H}$ - and  $^{13}\text{C}$ -NMR data for **3** in  $\text{CDCl}_3$  ( $\delta$  in ppm,  $J$  in Hz)<sup>a</sup>

| No. | $\delta_{\text{H}}$                        | $\delta_{\text{C}}$ | No.    | $\delta_{\text{H}}$        | $\delta_{\text{C}}$ |
|-----|--------------------------------------------|---------------------|--------|----------------------------|---------------------|
| 1   | -                                          | 173.5               | 16     | 1.05 (d, 3H, $J = 6.0$ )   | 8.9                 |
| 2   | 2.08 (d, 1H, $J = 16.8$ ),<br>2.60 (m, 1H) | 39.3                | 17     | 2.41 (1H, m), 2.82 (1H, m) | 43.7                |
| 3   | 3.84 (br d, $J = 10.8$ , 1H)               | 66.8                | 18     | 9.67 (1H, s)               | 202.6               |
| 4   | 1.75 (m, 1H)                               | 40.3                | 19     | 1.16 (d, 3H, $J = 6.6$ )   | 17.3                |
| 5   | 3.70 (br d, $J = 9.0$ , 1H)                | 81.6                | 20     | 1.43 (s, 3H)               | 14.8                |
| 6   | 1.97 (br d, $J = 11.4$ , 1H)               | 31.0                | 21     | 1.12 (d, 3H, $J = 6.6$ )   | 14.5                |
| 7   | 1.45 (m, 2H)                               | 31.1                | 22     | 1.50 (m, 1H), 1.75 (m, 1H) | 24.4                |
| 8   | 2.54 (m, 1H)                               | 45.2                | 23     | 0.87 (t, 3H, $J = 7.2$ )   | 8.9                 |
| 9   | -                                          | 200.7               | 1'     | 4.29 (d, 1H, $J = 6.6$ )   | 103.1               |
| 10  | 6.44 (d, 1H, $J = 15.6$ )                  | 122.9               | 2'     | 3.48 (m, 1H)               | 69.1                |
| 11  | 6.53 (d, 1H, $J = 15.6$ )                  | 151.1               | 3'     | 3.29 (m, 1H)               | 66.2                |
| 12  | -                                          | 59.7                | 4'     | 1.42 (m, 2H)               | 30.8                |
| 13  | 2.79 (m, 1H)                               | 67.5                | 5'     | 3.53 (m, 1H)               | 67.9                |
| 14  | 1.67 (m, 1H)                               | 37.5                | 6'     | 1.24 (d, 3H, $J = 6.6$ )   | 20.5                |
| 15  | 4.86 (m, 1H)                               | 76.9                | 7', 8' | 2.83 (s, 6H)               | 41.0                |

<sup>a</sup> **3** was identified as rosamicin A by comparing its  $^1\text{H}$  and  $^{13}\text{C}$  chemical shift values and optical rotation values with the data reported in Nakajima, S., Kojiri, K., Morishima, H., and Okanishi, M. *J. Antibiot.* **1990**, *43*, 1006; and US patent 4,161,523, 1979.

**Table S4**  $^1\text{H}$ - and  $^{13}\text{C}$ -NMR data for **4** in  $\text{CD}_3\text{OD}$  ( $\delta$  in ppm,  $J$  in Hz)

| No. | $\delta_H$                | $\delta_C$ |
|-----|---------------------------|------------|
| 1   | -                         | 166.2      |
| 2   | -                         | 98.8       |
| 3   | -                         | 166.0      |
| 4   | -                         | 108.7      |
| 5   | -                         | 152.3      |
| 6   | 6.49 (d, 1H, $J = 15.6$ ) | 115.2      |
| 7   | 7.09 (d, 1H, $J = 15.6$ ) | 138.3      |
| 8   | -                         | 135.3      |
| 9   | 5.71 (d, 1H, $J = 10.2$ ) | 136.4      |
| 10  | 3.71 (m, 1H)              | 46.2       |
| 11  | -                         | 212.2      |
| 12  | 2.54 (m, 2H)              | 33.6       |
| 13  | 1.01 (t, 3H, $J = 7.2$ )  | 6.5        |
| 14  | 1.96 (s, 3H)              | 7.6        |
| 15  | 2.07 (s, 3H)              | 8.0        |
| 16  | 1.97 (s, 3H)              | 11.1       |
| 17  | 1.18 (d, 3H, $J = 7.2$ )  | 15.2       |

**Table S5**  $^1\text{H}$ - and  $^{13}\text{C}$ -NMR data for **5** in  $\text{CDCl}_3$  ( $\delta$  in ppm,  $J$  in Hz)

| No. | $\delta_H$                | $\delta_C$ | No.    | $\delta_H$                                       | $\delta_C$ |
|-----|---------------------------|------------|--------|--------------------------------------------------|------------|
| 1   | -                         | 174        | 16     | 1.05 (br s, 3H)                                  | 9.3        |
| 2   | 2.60 (m, 2H)              | 39.5       | 17     | 1.45 (m, 2H)                                     | 31.1       |
| 3   | 3.79 (m, 1H)              | 67.0       | 18     | 3.61 (m, 1H), 3.70 (m, 1H)                       | 60.7       |
| 4   | 1.72 (m, 1H)              | 44.7       | 19     | 1.16 (d, 3H, $J = 6.6$ )                         | 17.4       |
| 5   | 3.74 (m, 1H)              | 81.4       | 20     | 1.44 (s, 3H)                                     | 15.0       |
| 6   | 1.44 (m, 1H)              | 31.1       | 21     | 3.89 (dd, 1H, $J = 3.0$ ,<br>10.8), 3.84 (m, 1H) | 61.5       |
| 7   | 1.63 (m, 2H)              | 28.9       | 22     | 1.60 (m, 1H), 1.88 (m, 1H)                       | 24.9       |
| 8   | 2.71 (m, 1H)              | 45.0       | 23     | 0.89 (t, 3H, $J = 7.2$ )                         | 9.2        |
| 9   | -                         | 201.3      | 1'     | 4.38 (d, 1H, $J = 7.2$ )                         | 103.3      |
| 10  | 6.46 (d, 1H, $J = 15.6$ ) | 123.6      | 2'     | 3.49 (m, 1H)                                     | 69.5       |
| 11  | 6.55 (d, 1H, $J = 15.6$ ) | 150.6      | 3'     | 3.32 (m, 1H)                                     | 66.5       |
| 12  | -                         | 59.2       | 4'     | 1.45 (m, 1H), 1.99 (m, 1H)                       | 31.2       |
| 13  | 3.15 (d, 1H, $J = 9.6$ )  | 64.8       | 5'     | 3.62 (m, 1H)                                     | 68.0       |
| 14  | 1.75 (m, 1H)              | 20.6       | 6'     | 1.27 (d, 3H, $J = 6.0$ )                         | 20.6       |
| 15  | 5.23 (m, 1H)              | 73.8       | 7', 8' | 2.84 (s, 6H)                                     | 39.8       |

**Table S6**  $^1\text{H}$ - and  $^{13}\text{C}$ -NMR data for **6** in  $\text{CDCl}_3$  ( $\delta$  in ppm,  $J$  in Hz)

| No. | $\delta_H$     | $\delta_C$ | No.    | $\delta_H$                     | $\delta_C$ |
|-----|----------------|------------|--------|--------------------------------|------------|
| 1   | -              | 174.2      | 16     | 1.08 (br s, 3H)                | 9.4        |
| 2   | 2.61 (m, 2H)   | 39.2       | 17     | 1.48 (m, 2H)                   | 31.3       |
| 3   | 3.83 (m, 1H)   | 67.1       | 18     | 3.62 (m, 1H), 3.69 (m, 1H)     | 60.8       |
| 4   | 1.75 (m, 1H)   | 40.5       | 19     | 1.16 (d, 3H, $J = 6.6$ )       | 17.5       |
| 5   | 3.74 (m, 1H)   | 81.6       | 20     | 1.71 (s, 3H)                   | 14.2       |
| 6   | 1.47 (m, 1H)   | 32.8       | 21     | 1.42 (s, 3H)                   | 25.9       |
| 7   | 1.71 (m, 2H)   | 32.8       | 22     | 1.82 (m, 2H)                   | 20.5       |
| 8   | 2.68 (m, 1H)   | 45.2       | 23     | 0.89 (t, 3H, $J = 7.2$ )       | 10.3       |
| 9   | -              | 201.1      | 1'     | 4.37 (d, 1H, $J = 6.6$ )       | 103.3      |
| 10  | 6.47 (brs, 1H) | 123.7      | 2'     | 3.50 (dd, 1H, $J = 7.8, 9.6$ ) | 69.6       |
| 11  | 6.47 (brs, 1H) | 150.6      | 3'     | 3.28 (m, 1H)                   | 66.7       |
| 12  | -              | 60.9       | 4'     | 1.46 (m, 1H), 2.03 (m, 1H)     | 31.4       |
| 13  | 2.80 (s, 1H)   | 68.8       | 5'     | 3.60 (m, 1H)                   | 68.0       |
| 14  | -              | 74.3       | 6'     | 1.27 (d, 3H, $J = 6.0$ )       | 20.7       |
| 15  | 5.01 (m, 1H)   | 78.3       | 7', 8' | 2.85 (s, 6H)                   | 39.8       |

**Table S7**  $^1\text{H}$ - and  $^{13}\text{C}$ -NMR data for **7** in  $\text{CDCl}_3$  ( $\delta$  in ppm,  $J$  in Hz)

| No. | $\delta_H$                | $\delta_C$ | No.    | $\delta_H$                                    | $\delta_C$ |
|-----|---------------------------|------------|--------|-----------------------------------------------|------------|
| 1   | -                         | 173.2      | 16     | 1.06 (d, 3H, $J = 7.2$ )                      | 9.1        |
| 2   | 2.64 (m, 2H)              | 39.5       | 17     | 2.32 (m, 1H), 2.91 (m, 1H)                    | 43.9       |
| 3   | 3.84 (m, 1H)              | 61.5       | 18     | 9.67 (s, 1H)                                  | 202.7      |
| 4   | 1.74 (m, 1H)              | 44.8       | 19     | 1.17 (d, 3H, $J = 7.2$ )                      | 17.4       |
| 5   | 3.71 (m, 1H)              | 81.9       | 20     | 1.45 (s, 3H)                                  | 15.0       |
| 6   | 1.46 (m, 1H)              | 31.3       | 21     | 3.89 (m, 1H), 3.90 (dd, 1H, $J = 3.0, 10.8$ ) | 61.6       |
| 7   | 1.69 (m, 2H)              | 31.8       | 22     | 1.56 (m, 1H), 1.84 (m, 1H)                    | 24.9       |
| 8   | 2.56 (m, 1H)              | 45.2       | 23     | 0.90 (t, 3H, $J = 7.2$ )                      | 9.1        |
| 9   | -                         | 200.7      | 1'     | 4.30 (d, 1H, $J = 7.2$ )                      | 103.6      |
| 10  | 6.46 (d, 1H, $J = 15.6$ ) | 123.5      | 2'     | 3.48 (m, 1H)                                  | 69.3       |
| 11  | 6.55 (d, 1H, $J = 15.6$ ) | 151.8      | 3'     | 3.24 (m, 1H)                                  | 66.8       |
| 12  | -                         | 59.0       | 4'     | 1.43 (m, 1H), 1.99 (m, 1H)                    | 31.3       |
| 13  | 3.14 (m, 1H)              | 64.8       | 5'     | 3.54 (m, 1H)                                  | 68.0       |
| 14  | 1.75 (m, 1H)              | 20.3       | 6'     | 1.25 (d, 3H, $J = 5.4$ )                      | 20.7       |
| 15  | 5.24 (m, 1H)              | 73.7       | 7', 8' | 2.83 (s, 6H)                                  | 39.0       |

**Table S8**  $^1\text{H}$ - and  $^{13}\text{C}$ -NMR data for **8** in  $\text{CDCl}_3$  ( $\delta$  in ppm,  $J$  in Hz)

| No. | $\delta_{\text{H}}$             | $\delta_{\text{C}}$ | No.    | $\delta_{\text{H}}$        | $\delta_{\text{C}}$ |
|-----|---------------------------------|---------------------|--------|----------------------------|---------------------|
| 1   | -                               | 173.9               | 16     | 1.07 (d, 3H, $J = 6.6$ )   | 9.2                 |
| 2   | 2.64 (d, 2H, $J = 10.2$ )       | 39.4                | 17     | 2.45 (m, 1H), 2.91 (m, 1H) | 43.8                |
| 3   | 3.88 (m, 1H)                    | 67.0                | 18     | 9.67 (s, 1H)               | 202.7               |
| 4   | 1.77 (m, 1H)                    | 40.6                | 19     | 1.16 (d, 3H, $J = 7.2$ )   | 17.5                |
| 5   | 3.70 (m, 1H)                    | 81.8                | 20     | 1.71 (s, 3H)               | 14.1                |
| 6   | 1.45 (m, 1H)                    | 31.4                | 21     | 1.42 (s, 3H)               | 25.9                |
| 7   | 1.78 (m, 2H)                    | 31.9                | 22     | 1.82 (m, 2H)               | 20.7                |
| 8   | 2.63 (m, 1H)                    | 45.4                | 23     | 0.90 (t, 3H, $J = 7.2$ )   | 10.2                |
| 9   | -                               | 200.5               | 1'     | 4.29 (d, 1H, $J = 7.2$ )   | 103.3               |
| 10  | 6.49 (d, 1H, $J = 15.6$ )       | 123.4               | 2'     | 3.49 (m, 1H)               | 69.3                |
| 11  | 6.51 (d, 1H, $J = 15.6$ )       | 151.0               | 3'     | 3.26 (m, 1H)               | 66.6                |
| 12  | -                               | 61.0                | 4'     | 1.46 (m, 1H), 2.01 (m, 1H) | 31.2                |
| 13  | 2.91 (s, 1H)                    | 68.7                | 5'     | 3.54 (m, 1H)               | 67.9                |
| 14  | -                               | 74.3                | 6'     | 1.25 (d, 3H, $J = 6.0$ )   | 20.7                |
| 15  | 5.01 (dd, 1H, $J = 2.4, 10.8$ ) | 78.3                | 7', 8' | 2.83 (s, 6H)               | 39.3                |

**Table S9**  $^1\text{H}$ - and  $^{13}\text{C}$ -NMR data for **9** in  $\text{CDCl}_3$  ( $\delta$  in ppm,  $J$  in Hz)

| No. | $\delta_H$                                       | $\delta_C$ | No. | $\delta_H$                 | $\delta_C$ |
|-----|--------------------------------------------------|------------|-----|----------------------------|------------|
| 1   | -                                                | 172.8      | 16  | 1.02 (d, 3H, $J = 6.6$ )   | 7.8        |
| 2   | 2.20 (dd, 1H, $J = 3.0, 15.9$ ),<br>2.47 (m, 1H) | 39.4       | 17  | 1.46 (m, 1H), 1.62 (m, 1H) | 21.5       |
| 3   | 4.25 (m, 1H)                                     | 67.7       | 18  | 0.77 (t, 3H, $J = 6.6$ )   | 11.8       |
| 4   | 2.45 (m, 1H)                                     | 47.5       | 19  | 1.19 (d, 3H, $J = 6.6$ )   | 17.1       |
| 5   | -                                                | 213.5      | 20  | 1.84 (s, 3H)               | 12.9       |
| 6   | 2.42 (m, 1H)                                     | 48.7       | 21  | 3.71 (m, 1H), 3.74 (m, 1H) | 62.4       |
| 7   | 1.37 (m, 1H), 1.75 (m, 1H)                       | 36.6       | 22  | 1.61 (m, 1H), 1.82 (m, 1H) | 25.2       |
| 8   | 2.76 (m, 1H)                                     | 44.8       | 23  | 0.92 (t, 3H, $J = 7.2$ )   | 9.3        |
| 9   | -                                                | 203.5      |     |                            |            |
| 10  | 6.36 (d, 1H, $J = 15.6$ )                        | 119.8      |     |                            |            |
| 11  | 7.34 (d, 1H, $J = 15.6$ )                        | 148.3      |     |                            |            |
| 12  | -                                                | 135.8      |     |                            |            |
| 13  | 5.95 (d, 1H, $J = 10.2$ )                        | 141.7      |     |                            |            |
| 14  | 2.89 (m, 1H)                                     | 46.7       |     |                            |            |
| 15  | 4.97 (m, 1H)                                     | 75.1       |     |                            |            |

**Table S10** Minimum inhibitory concentration (MIC) values ( $\mu\text{g/mL}$ ) of **5-8** and erythromycin against a panel of medically-important human bacterial pathogens

<sup>a</sup> Testing performed in RPMI with 5% LB, <sup>b</sup>Testing performed in CA-MHB media with 5% lysed horse blood

|                                                           | <b>5</b> | <b>6</b> | <b>7</b> | <b>8</b> | <b>erythromycin</b> |
|-----------------------------------------------------------|----------|----------|----------|----------|---------------------|
| <i>Acinetobacter baumannii</i> ATCC17978 <sup>a</sup>     | 50       | 100      | 50       | 50       | 1.56                |
| Uropathogenic <i>Escherichia coli</i> CFT073 <sup>a</sup> | 50       | 50       | 100      | 50       | 6.25                |
| <i>Pseudomonas aeruginosa</i> PA01 <sup>a</sup>           | 50       | 100      | 100      | 25       | 6.25                |
| <i>Streptococcus pyogenes</i> 5448 <sup>b</sup>           | 50       | >100     | 100      | 6.125    | 0.39                |
| <i>Streptococcus pyogenes</i> NZ131 <sup>b</sup>          | 50       | >100     | 50       | 6.125    | 0.19                |
| <i>Staphylococcus aureus</i> USA300 <sup>b</sup>          | 12.5     | 25       | 6.25     | 1.56     | 1.56                |
